# Supplementary material for: Oxygen evolution reaction on IrO2(110) is governed by Walden-type mechanisms
Source: Research Square preprint supplement (doi:10.21203/rs.3.rs-4101847/v1), 2024-04-04
Supplement: Supplementary file 1 [file fbae69831a113b5c639e11d1.pdf]

## Supporting Information

### Oxygen evolution reaction on IrO<sub>2</sub>(110) is governed by Walden-type mechanisms

Muhammad Usama<sup>1,2</sup>, Samad Razzaq<sup>1</sup>, Christof Hättig<sup>2,3</sup>, Kai S. Exner<sup>1,2,4,\*</sup>

<sup>1</sup> University Duisburg-Essen, Faculty of Chemistry, Theoretical Inorganic Chemistry,  
Universitätsstraße 5, 45141 Essen, Germany

<sup>2</sup> Cluster of Excellence RESOLV, Bochum, Germany

<sup>3</sup> Lehrstuhl für Theoretische Chemie, Ruhr-Universität Bochum, D-44780 Bochum

<sup>4</sup> Center for Nanointegration (CENIDE) Duisburg-Essen, Duisburg, Germany

\* Corresponding author: [kai.exner@uni-due.de](mailto:kai.exner@uni-due.de) ORCID: 0000-0003-2934-6075

### Keywords

oxygen evolution reaction; IrO<sub>2</sub>; descriptor approach; reaction mechanism; Walden inversion

### 1 Computational Details

To comprehend the elementary steps of the oxygen evolution reaction (OER) over IrO<sub>2</sub>(110), we apply electronic structure calculations in the density functional theory (DFT) approximation as implemented in the Vienna Ab Initio Simulation Package (VASP)<sup>1-3</sup>. To visualize and construct the unit cell and slab models, the VESTA software is used<sup>4</sup>.

Initially, we optimize the bulk structure of rutile IrO<sub>2</sub> and obtain unit cell dimensions of  $a = b = 4.50$  Å and  $c = 3.15$  Å. These values closely resemble experimental reports from the literature ( $a = b = 4.51$  Å,  $c = 3.16$  Å).<sup>5</sup> Subsequently we construct a (2x1) surface slab model along the (110) direction with the aid of VESTA. Benchmark calculations were performed to optimize the plane-wave basis set cutoff energy (ENCUT), the k-point mesh, and the lattice constants of the crystal structure. In our study, we use ENCUT = 440 eV and a 7 x 7 x 1  $\Gamma$ -centered k-point mesh to sample the Brillouin zone for the numerical integration in the reciprocal space. A 5-layered asymmetric slab model is chosen for the determination of free energies for adsorbate structures on-top of the (2x1) IrO<sub>2</sub>(110) surface. While the atoms in the lower two layers are fixed, all atoms of the upper three layers including adsorbates are allowed to freely relax. To minimize interactions between periodic images, a vacuum gap of at least 12 Å is incorporated along the surface normal direction.

For the description of the electronic structure, the Perdew-Burke-Ernzerhof (PBE)<sup>6</sup> and revised PBE (RPBE)<sup>7</sup> exchange correlation functionals are employed, along with the DFT-D3 method of Grimme et al.<sup>8</sup> to correct the obtained energetics in terms of dispersion effects. Additionally, a dipole correction in the direction perpendicular to the surface is included in our calculations due to the choice of an asymmetric slab model. We make use of projector augmented wave (PAW) pseudopotentials<sup>9</sup> with the cutoff energy specified in the above for the plane-wave-basis set. The Methfessel-Paxton smearing method is applied for the atomic structure optimization with a

smearing width of 0.20 eV. The convergence criterion for forces and convergence of the total energy along the self-consistent field (SCF) is set to 0.01 eV/Å and  $10^{-6}$  eV, respectively.

To describe the impact of the aqueous electrolyte on the adsorption free energies, we apply a continuum model in the realm of implicit solvation by referring to the VASPsol package.<sup>10,11</sup> The relative permittivity of water and the Debye length are set to 78.4 and 3.0 Å (corresponding to 1 M bulk electrolyte concentration), respectively.

Electrochemical experiments are carried out under constant potentials whereas the most popular approach to determine adsorption free energies refers to canonical DFT calculations (constant charge). To this end, we apply grand canonical DFT calculations by applying a calibrated standard hydrogen electrode (SHE) within VASPsol. We adopt the reported electrochemical potential of an electron with respect to SHE ( $\mu_e^{\text{SHE}}$ ), which amounts to  $-4.66$  eV at 0 V vs. SHE.<sup>12</sup> For the assessment of electronic structure alterations and comprehension of charge state variations during the electrocatalytic processes of OER, we apply Bader charge analysis using the Henkelman Group script<sup>13</sup> designed for VASP.

## 2 Pourbaix Diagram of IrO<sub>2</sub> (110)

### 2.1 Pourbaix diagrams in electrocatalysis

In the following, we discuss the construction of a Pourbaix diagram for the IrO<sub>2</sub>(110) surface under OER conditions. This is achieved by the connection of DFT calculations, analyzed by means of the computational hydrogen electrode (CHE) approach<sup>14</sup>, with a thermodynamic-electrochemical evaluation of adsorption free energies for different adsorbate structures.<sup>15–17</sup>

Pourbaix diagrams indicate the energetically most stable surface structure as a function of the applied electrode potential,  $U$ , and pH. To gain insight into the surface structure of a single-crystalline IrO<sub>2</sub>(110) model electrode under OER conditions, we determine the adsorption free energies for a variety of surface configurations containing the \*OH, \*O, \*OOH, and \*OO adsorbates on coordinatively unsaturated Ir surface sites, as these species are reconciled with intermediate structures during the OER. Thereafter, we minimize the free energies of the various surface phases as a function of  $U$  and pH, and the thermodynamically preferred surface configuration with the lowest free energy is displayed in the Pourbaix diagram.

It is a common consensus in the theoretical electrochemistry community that the energetically favored surface phase at the equilibrium potential of an electrocatalytic process is used as the active surface configuration for the modeling of mechanistic pathways<sup>18–26</sup>. While our current study builds upon this notion, we go one step beyond this approximation in that we model the mechanistic pathways over a variety of different surface phases that reveal a similar energetics (cf. **Figure 1b-e** in the main text). This finding is further discussed in the main text of our article, and in the following we provide a thorough mathematical framework for the determination of ab initio Pourbaix diagrams.

## 2.2 Mathematical framework

### 2.2.1 Adsorption processes and reference states

DFT-based Pourbaix diagrams are constructed based on a thermodynamic evaluation of reaction equations for a well-defined reference state. On the one hand, we select the stoichiometric  $\text{IrO}_2(110)$  surface  $- 2\text{O}_{\text{br}} + 2*_{\text{cus}}$  as a reference (cf. **Figure S1**). In this surface phase, the coordinatively unsaturated (cus)  $\text{Ir}_{\text{cus}}$  sites are vacant, while the iridium bridge (br) sites,  $\text{Ir}_{\text{br}}$ , are capped by surface oxygen,  $\text{O}_{\text{br}}$ .

Adsorption processes can take place on both the  $\text{Ir}_{\text{cus}}$  and  $\text{Ir}_{\text{br}}$  sites; e. g., the formation of a hydroxyl adsorbate,  $*\text{OH}$ , on-top (ot) of  $\text{Ir}_{\text{cus}}$  (abbreviated  $*_{\text{cus}}$ ) reads:

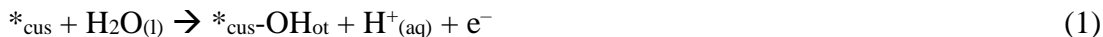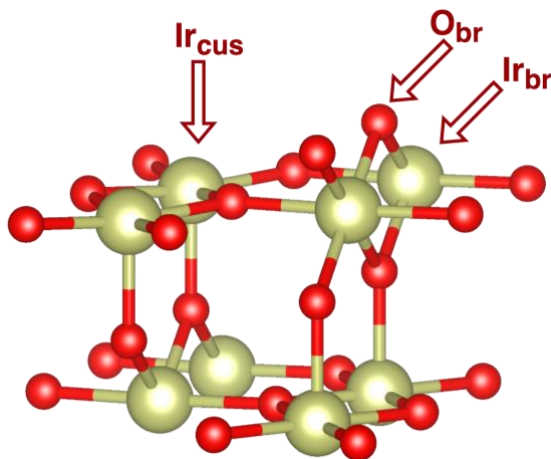

**Figure S1.** Two uppermost layers of the stoichiometric (2x1)  $\text{IrO}_2(110)$  surface. The surface comprises two distinct types of Ir atoms, cus and bridge sites. In the stoichiometric  $\text{IrO}_2(110)$  surface, cus sites are unoccupied, while bridge sites are oxygen-covered. This is labeled as  $\text{Ir}_{\text{cus}}$  (short:  $*_{\text{cus}}$ ) and  $\text{O}_{\text{br}}$ , respectively.

As the determination of the free energy of liquid water by DFT calculations is error-prone, we use gaseous water at  $T = 298.15$  K and  $p = 0.035$  bar as a reference state. This is justified by referring to the equilibrium between water vapor and liquid water at the specified temperature and pressure. Following the formalism of the CHE approach, the reference state for a proton-electron pair at  $U = 0$  V vs. SHE (standard hydrogen electrode),  $\text{pH} = 0$ ,  $T = 298.15$ , and  $p_{\text{H}_2} = 1$  atm refers to gaseous hydrogen by referring to the equilibrium of equation (2):

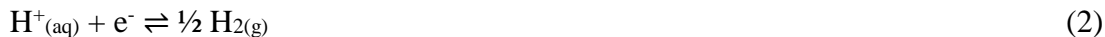

Hence, it is sufficient to calculate a hydrogen molecule by DFT as the chemical potentials of the hydrated proton and the electron are elegantly connected to the free energy of  $\text{H}_2$ :

$$\mu(\text{H}^+_{(\text{aq})}) + \mu(\text{e}^-) = \frac{1}{2} G(\text{H}_{2(\text{g})}) \quad (3)$$

### 2.2.2 Determination of adsorption free energies

Calculating the Gibbs free-energy change ( $\Delta G$ ) for an adsorption process such as specified in equation (1) is paramount for the construction of surface Pourbaix diagrams. In case of several adsorbates in the (2x1) unit cell, the respective equations are simply combined; e. g., for the formation of \*OH and \*O on-top of two adjacent Ir<sub>cus</sub> sites, we arrive at:

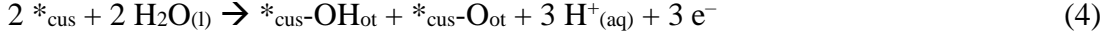

The corresponding  $\Delta G$  value for the adsorption processes reads:

$$\Delta G(0,0) = G(\text{ *}_{\text{cus}}\text{-OH}_{\text{ot}} + \text{ *}_{\text{cus}}\text{-O}_{\text{ot}}) + 1.5 G(\text{H}_2) - G(2 \text{ *}_{\text{cus}}) - 2 G(\text{H}_2\text{O}) \quad (5)$$

The term (0,0) in equation (5) indicates that this  $\Delta G$  value refers to zero electrode potential and zero pH. For all possible adsorbate structures,  $\Delta G(0,0)$  values can be obtained by DFT calculations when evaluating equation (6):

$$\Delta G(0,0) = \Delta E_{\text{tot}} + \Delta E_{\text{ZPE}} - T\Delta S \quad (6)$$

Here,  $\Delta E_{\text{tot}}$  denotes the difference in the electronic energy between the adsorbate-covered surface and the stoichiometric IrO<sub>2</sub>(110) surface including the respective reference states:

$$\Delta E_{\text{tot}} = E(\text{ *}_{\text{cus}}\text{-OH}_{\text{ot}} + \text{ *}_{\text{cus}}\text{-O}_{\text{ot}}) + 1.5 E(\text{H}_2) - E(2 \text{ *}_{\text{cus}}) - 2 E(\text{H}_2\text{O}) \quad (7)$$

$\Delta E_{\text{ZPE}}$  indicates the difference in the zero-point energy between the adsorbate-covered surface and the stoichiometric IrO<sub>2</sub>(110) surface including the respective reference states. This term is determined by frequency calculations for the reference molecules and the surface slabs where the two bottom two layers were fixed and the uppermost three layers and adsorbates are allowed to freely relax:

$$\Delta ZPE = ZPE(\text{ *}_{\text{cus}}\text{-OH}_{\text{ot}} + \text{ *}_{\text{cus}}\text{-O}_{\text{ot}}) + 1.5 ZPE(\text{H}_2) - ZPE(2 \text{ *}_{\text{cus}}) - 2 ZPE(\text{H}_2\text{O}) \quad (8)$$

Finally, the term  $T\Delta S$  refers to the entropic change upon adsorption. For the IrO<sub>2</sub>(110) surface and intermediates, the vibrational entropy,  $S_{\text{vib}}$ , of adsorbates is determined by evaluating equation (9):

$$TS_{\text{vib}} = k_B N_A T \sum_i^n \frac{h\nu_i/k_B T}{e^{h\nu_i/k_B T} - 1} - \ln(1 - e^{-h\nu_i/k_B T}) \quad (9)$$

For the reference molecules water and gaseous hydrogen, the standard entropies,  $S^0$ , are taken from thermodynamic data tables.<sup>14</sup> We obtain for the change in entropy during the adsorption process:

$$\Delta S = S_{\text{vib}}(\text{ *}_{\text{cus}}\text{-OH}_{\text{ot}} + \text{ *}_{\text{cus}}\text{-O}_{\text{ot}}) + 1.5 S^0(\text{H}_2) - S_{\text{vib}}(2 \text{ *}_{\text{cus}}) - 2 S^0(\text{H}_2\text{O}) \quad (10)$$

By counting the number of transferred protons,  $\nu(\text{H}^+)$ , and electrons,  $\nu(\text{e}^-)$ , in each adsorption process, it is possible to translate the  $\Delta G(0,0)$  values to potential-dependent free-energy changes:

$$\Delta G(pH, U) = \Delta G(0,0) - \nu(\text{H}^+) k_{\text{B}}T(\ln 10)pH - \nu(\text{e}^-)eU \quad (11)$$

For instance, for the formation of the  $^*\text{cus-OH}_{\text{ot}} + ^*\text{cus-O}_{\text{ot}}$  phase in equation (4), we infer:

$$\Delta G(pH, U) = \Delta G(0,0) - 3 k_{\text{B}}T(\ln 10)pH - 3eU \quad (12)$$

In equations (11) and (12),  $e$  and  $k_{\text{B}}$  denote the elementary charge and Boltzmann's constant, respectively. Note that the term  $k_{\text{B}}T(\ln 10)$  amounts to 0.059 V for  $T = 298.15$  K.

By minimizing the  $\Delta G(pH, U)$  values for all possible adsorbate configurations of the (2x1)  $\text{IrO}_2(110)$  surface, the energetically preferred surface phase as a function of  $U$  and  $pH$  is derived, which is depicted in the Pourbaix diagram (cf. **Figure 1** in the main text).

### 2.2.3 SHE vs. RHE: A matter of convenience

While the standard hydrogen electrode (SHE) is often used as the reference for the applied electrode potential,  $U$ , in Pourbaix diagrams, we point out that it is possible to translate equation (11) to the RHE (reversible hydrogen electrode) scale when considering the following correlation:

$$U_{\text{SHE}} = U_{\text{RHE}} + k_{\text{B}}T(\ln 10) pH \quad (13)$$

Therefore, we obtain for the evaluation of free-energy changes for adsorption processes:

$$\Delta G(U_{\text{RHE}}) = \Delta G(0,0) - \nu(\text{e}^-)eU_{\text{RHE}} \quad (14)$$

Note that this transformation is only reasonable if the adsorbate structures formed reveal the same number of transferred protons,  $\nu(\text{H}^+)$ , and electrons,  $\nu(\text{e}^-)$ , in the adsorption process. This prerequisite is obviously met for all OER adsorbates ( $^*\text{OH}$ ,  $^*\text{O}$ ,  $^*\text{OOH}$ , and  $^*\text{O}$ ), and to this end we discuss the Pourbaix diagrams and reaction mechanisms on the RHE rather than the SHE scale.

## 2.3 Pourbaix diagram of $\text{IrO}_2(110)$ under anodic reaction conditions

We construct surface Pourbaix diagrams for the  $\text{IrO}_2(110)$  surface under OER conditions by utilizing in-house scripts<sup>27</sup> that facilitate the analysis of the free-energy changes for various surface configurations as obtained by equation (14). All surface structures considered in this work including their free-energy changes are listed in **Table S1**. To account for a comparison between different exchange correlation functionals, we report the free energies for both the PBE and RPBE representations.

**Table S1.** Free-energy changes,  $\Delta G(0,0)$ , of different surface configurations with respect to the reference structure  $2\text{O}_{\text{br}} + 2^*_{\text{cus}}$  using the PBE and RPBE functionals.

|    | Structure                                                                                                                      | $\Delta G(0,0)$<br>[eV]                            | $\Delta G(0,0)$<br>[eV]                            |
|----|--------------------------------------------------------------------------------------------------------------------------------|----------------------------------------------------|----------------------------------------------------|
|    |                                                                                                                                | PBE                                                | RPBE                                               |
|    | $2\text{O}_{\text{br}} + 2^*_{\text{cus}}$<br><b>Reference</b>                                                                 | 0                                                  | 0                                                  |
| 1  | $2\text{OH}_{\text{br}} + 2^*_{\text{cus}}\text{-OH}_{\text{ot}}$                                                              | -2.59                                              | -2.19                                              |
| 2  | $2\text{OH}_{\text{br}} + 1^*_{\text{cus}}\text{-OH}_{\text{ot}} 1^*_{\text{cus}}\text{-O}_{\text{ot}}$                        | -0.96                                              | -0.56                                              |
| 3  | $1\text{OH}_{\text{br}}1\text{O}_{\text{br}} + 2^*_{\text{cus}}\text{-OH}_{\text{ot}}$                                         | -1.55                                              | -1.15                                              |
| 4  | $2\text{OH}_{\text{br}} + 2^*_{\text{cus}}\text{-O}_{\text{ot}}$                                                               | 0.71                                               | 1.12                                               |
| 5  | $1\text{OH}_{\text{br}}1\text{O}_{\text{br}} + 1^*_{\text{cus}}\text{-OH}_{\text{ot}} 1^*_{\text{cus}}\text{-O}_{\text{ot}}$   | 0.11                                               | 0.50                                               |
| 6  | $2\text{O}_{\text{br}} + 2^*_{\text{cus}}\text{-OH}_{\text{ot}}$                                                               | -0.33                                              | 0.07                                               |
| 7  | $1\text{OH}_{\text{br}}1\text{O}_{\text{br}} + 2^*_{\text{cus}}\text{-O}_{\text{ot}}$                                          | 1.80                                               | 2.19                                               |
| 8  | $2\text{O}_{\text{br}} + 1^*_{\text{cus}}\text{-OH}_{\text{ot}} 1^*_{\text{cus}}\text{-O}_{\text{ot}}$                         | 1.43                                               | 1.83                                               |
| 9  | $2\text{O}_{\text{br}} + 2^*_{\text{cus}}\text{-O}_{\text{ot}}$                                                                | 3.09                                               | 3.55                                               |
| 10 | $2\text{O}_{\text{br}} + 1^*_{\text{cus}}\text{-O}_{\text{ot}} 1^*_{\text{cus}}\text{-OOH}_{\text{ot}}$                        | 4.42                                               | 5.03                                               |
| 11 | $1\text{O}_{\text{br}}1\text{OOH}_{\text{br}} + 1^*_{\text{cus}}\text{-O}_{\text{ot}} 1^*_{\text{cus}}\text{-OOH}_{\text{ot}}$ | H moves to $1^*_{\text{cus}}\text{-O}_{\text{ot}}$ | H moves to $1^*_{\text{cus}}\text{-O}_{\text{ot}}$ |
| 12 | $1\text{O}_{\text{br}}1\text{OOH}_{\text{br}} + 2^*_{\text{cus}}\text{-O}_{\text{ot}}$                                         | 5.09                                               | 5.68                                               |
| 13 | $2\text{O}_{\text{br}} + 2^*_{\text{cus}}\text{-OOH}_{\text{ot}}$                                                              | 6.62                                               | 7.51                                               |
| 14 | $2\text{OOH}_{\text{br}} + 2^*_{\text{cus}}\text{-O}_{\text{ot}}$                                                              | 7.36                                               | 8.17                                               |
| 15 | $1\text{O}_{\text{br}}1\text{OOH}_{\text{br}} + 2^*_{\text{cus}}\text{-OOH}_{\text{ot}}$                                       | 7.94                                               | 9.09                                               |
| 16 | $2\text{OOH}_{\text{br}} + 1^*_{\text{cus}}\text{-O}_{\text{ot}} 1^*_{\text{cus}}\text{-OOH}_{\text{ot}}$                      | H moves to $1^*_{\text{cus}}\text{-O}_{\text{ot}}$ | H moves to $1^*_{\text{cus}}\text{-O}_{\text{ot}}$ |
| 17 | $2\text{OOH}_{\text{br}} + 2^*_{\text{cus}}\text{-OOH}_{\text{ot}}$                                                            | 11.01                                              | 12.40                                              |
| 18 | $2\text{OH}_{\text{br}} + 2^*_{\text{cus}}$                                                                                    | -1.59                                              | -1.72                                              |

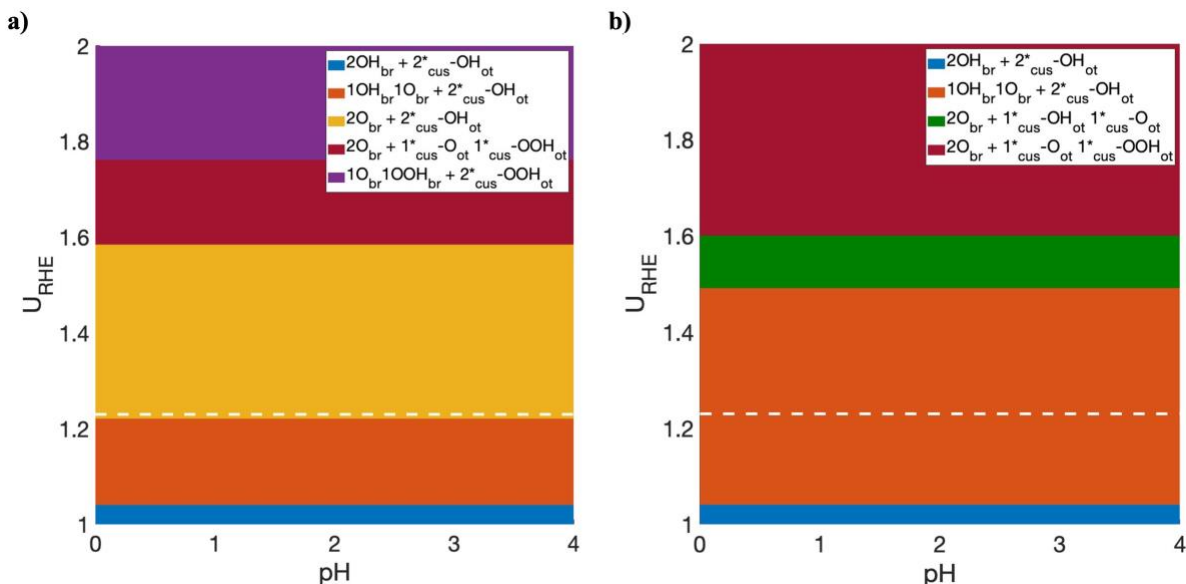

**Figure S2.** Pourbaix diagram for a  $\text{IrO}_2(110)$  surface under anodic reaction conditions. Only the thermodynamically preferred surface phase with the lowest free energy is indicated. The white dotted line represents the equilibrium potential of the OER; that is,  $U_{\text{OER}}^0 = 1.23$  V vs. RHE. Panels **a)** and **b)** refer to the PBE and RPBE functionals, respectively.

**Figure S2** illustrates that there are only minor quantitative differences in the preferred surface structure when employing the PBE or RPBE functionals in the DFT calculations. Various surface configurations turn out to be stable under anodic conditions, ranging from a fully hydroxylated surface ( $2\text{OH}_{\text{br}} + 2^*_{\text{cus}}\text{-OH}_{\text{ot}}$ ) to partially hydroxylated surfaces ( $1\text{OH}_{\text{br}} 1\text{O}_{\text{br}} + 2^*_{\text{cus}}\text{-OH}_{\text{ot}}$  or  $2\text{O}_{\text{br}} + 2^*_{\text{cus}}\text{-OH}_{\text{ot}}$ ) or partially OOH-covered surfaces ( $2\text{O}_{\text{br}} + 1^*_{\text{cus}}\text{-OOH}_{\text{ot}} 1^*_{\text{cus}}\text{-O}_{\text{ot}}$  or  $1\text{O}_{\text{br}} 1\text{OOH}_{\text{br}} + 2^*_{\text{cus}}\text{-OOH}_{\text{ot}}$ ). The respective potential range where these surfaces are energetically preferred can vary up to about 200 mV on the RHE scale between the two different functionals, which is still within the error bars of conventional DFT approaches.

To this end, we consider multiple surface structures, ranging from hydroxylated to oxygen-covered, and OOH-covered surfaces (cf. section 3 of the SI or **Figure 1b-e** in the main text) to comprehend the elementary steps of the OER over  $\text{IrO}_2(110)$ . All further calculations were performed with the PBE functional as the above comparison of the Pourbaix diagrams reveals that there are no qualitative differences between the PBE and RPBE descriptions.

### 3 Mechanistic Pathways for Oxygen Evolution Reaction (OER)

In our mechanistic study, we factor a variety of different reaction mechanisms into the analysis, following the previous work by one of the authors.<sup>28</sup> Reaction equations for the elementary steps of each pathway are provided in the following.

#### 3.1 Mononuclear mechanism

The mononuclear mechanism consists of the subsequent formation of the  $^*\text{OH}$ ,  $^*\text{O}$ , and  $^*\text{OOH}$  intermediates:<sup>18,19</sup>

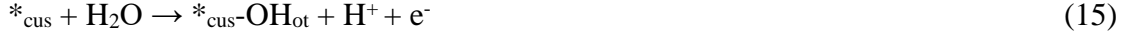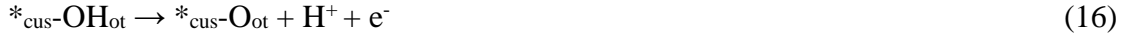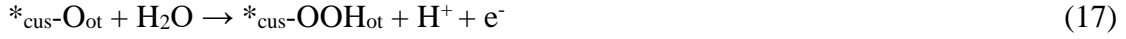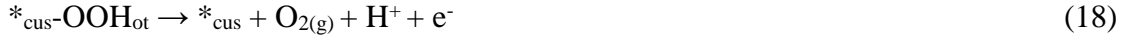

### 3.2 Bifunctional I mechanism

The bifunctional I mechanism differs from the mononuclear mechanism in that instead of the  $*\text{OOH}$  adsorbate, the  $*\text{OO}$  intermediate is formed by transferring one proton to a neighboring cus or bridge site.<sup>21</sup>

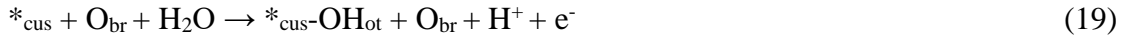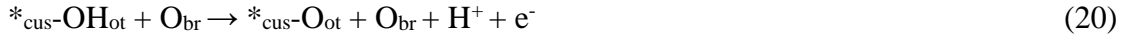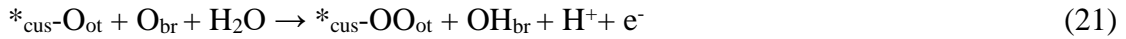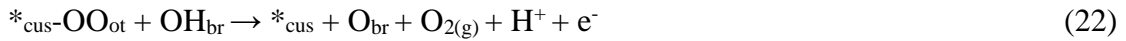

### 3.3 Bifunctional II mechanism

In contrast to the bifunctional I mechanism, the bifunctional II mechanism<sup>20,22,23</sup> consists of a chemical reaction step, in which the second water molecule is adsorbed to the surface without the direct release of a proton-electron pair:

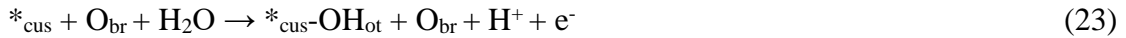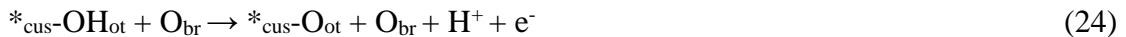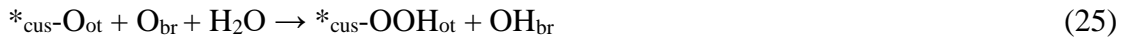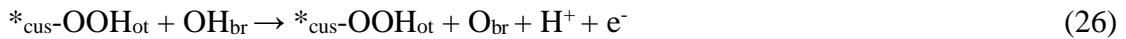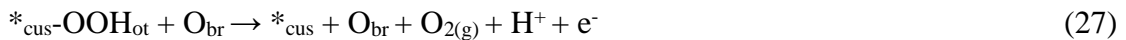

### 3.4 Oxide mechanism

The oxide mechanism<sup>26</sup> commences from two adjacent oxygen adsorbates ( $*\text{O}$ ), and gaseous oxygen is formed by the chemical recombination of the outermost oxygen atoms of two adjacent  $*\text{OO}$  intermediates:

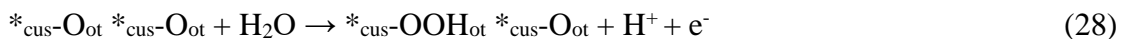



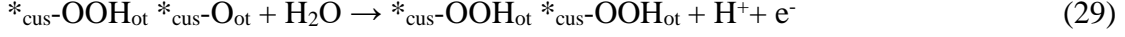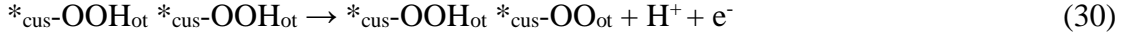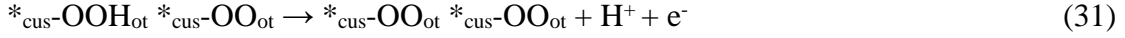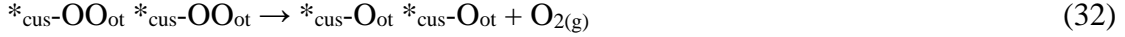

### 3.5 Binuclear mechanism

In the binuclear mechanism,<sup>24,25</sup> two adjacent oxygen adsorbates (\*O) recombine by a chemical step to release the product gaseous oxygen:

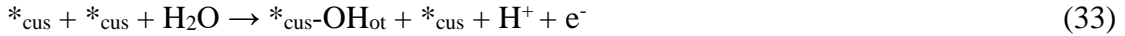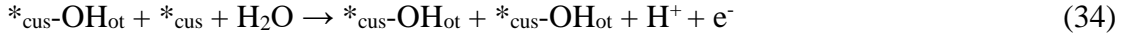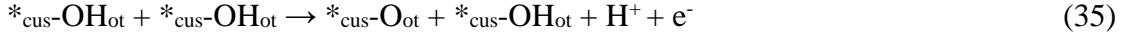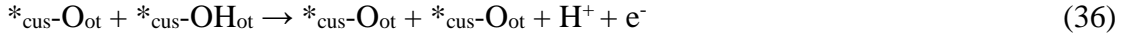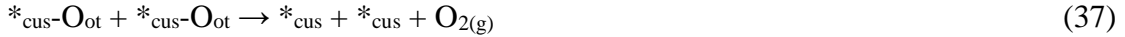

The above pathways are modeled for the following four surface configurations of IrO<sub>2</sub>(110):

- a) Fully hydroxylated surface (2OH<sub>br</sub> + 2\*<sub>cus</sub>-OH<sub>ot</sub>)
- b) Partly hydroxylated surface (2O<sub>br</sub> + 2\*<sub>cus</sub>-OH<sub>ot</sub>)
- c) Fully oxygen-covered surface (2O<sub>br</sub> + 2\*<sub>cus</sub>-O<sub>ot</sub>)
- d) Partly OOH-covered surface (2O<sub>br</sub> + 1\*<sub>cus</sub>-OOH<sub>ot</sub> 1\*<sub>cus</sub>-O<sub>ot</sub>)

This choice is based on the Pourbaix diagram of **Figure S2** as the free-energy differences between the respective phases can be less than 0.1 eV in the potential window of  $U = 1.4 - 1.6$  V vs. RHE, indicating that all these phases can potentially contribute to the formation of gaseous oxygen during the OER. A sketch of the uppermost layer for the fully oxygen-covered (2x1) IrO<sub>2</sub>(110) surface is given in **Figure S3**.

Electrocatalytic activity for each pathway is assessed by the activity descriptor  $G_{\text{max}}(U)$  as introduced in a recent contribution.<sup>29,30</sup> While the most popular activity descriptor in the electrocatalysis community refers to the thermodynamic overpotential,  $\eta_{\text{TD}}$ ,<sup>14,31</sup> the difference between  $\eta_{\text{TD}}$  and  $G_{\text{max}}(U)$  refers to the fact that  $\eta_{\text{TD}}$  renders activity predictions at the equilibrium potential of an electrocatalytic process whereas  $G_{\text{max}}(U)$  allows potential-dependent activity analyses. Due to relying on the concept of a free-energy span model,<sup>32</sup>  $G_{\text{max}}(U)$  captures overpotential and kinetic effects at least to a qualitative extent in the thermodynamic evaluation of adsorption free energies. In addition, this descriptor is further complemented with a measure for sensitivity: only if two pathways reveal a difference in  $G_{\text{max}}(U)$  of at least by 200 meV at a fixed electrode potential, it can be concluded unambiguously that the pathway with the lower

$G_{\max}(U)$  is operative.<sup>29</sup> This is the reason why we adopt the concept of  $G_{\max}(U)$  rather than the notion of  $\eta_{\text{TD}}$  in our mechanistic analysis for the OER over IrO<sub>2</sub>(110).

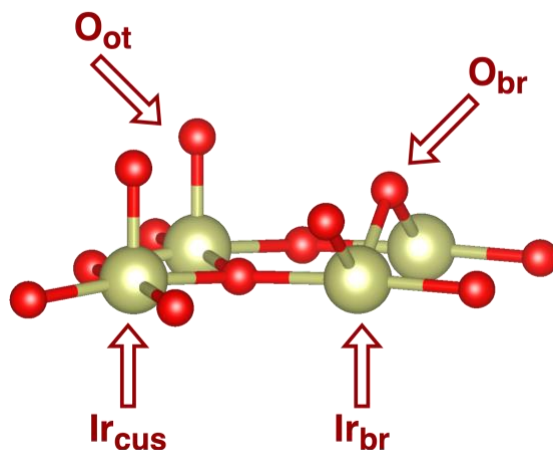

**Figure S3.** Uppermost layer of the fully oxygen-covered (2x1) IrO<sub>2</sub>(110) surface. Note that this representation of the surface is used in the following for the mechanistic discussion of the various pathways.

## 4 OER over the fully hydroxylated IrO<sub>2</sub>(110) surface

### 4.1 Mononuclear Mechanism

The mononuclear mechanism comprises the formation of the \*OH (step 1), \*O (step 2), and \*OOH (step 3) intermediates, which is followed by the subsequent release of the product O<sub>2</sub> (step 4). **Table S2** compiles the free-energy changes for each elementary step at  $U = 0$  V vs. RHE and the activity descriptor  $G_{\max}(U)$  at different applied electrode potentials under OER conditions. The corresponding free-energy diagram is depicted in **Figure S4a**, with a visual representation of the elementary steps in **Figure S4b**. In the potential range of 1.23 V to 1.53 V vs. RHE, the limiting free-energy span is reconciled with  $*_{\text{cus}}\text{-OH}_{\text{ot}} \rightarrow *_{\text{cus}}\text{-O}_{\text{ot}} \rightarrow *_{\text{cus}}\text{-OOH}_{\text{ot}} \rightarrow *_{\text{cus}} + \text{O}_2$  due to the strong adsorption of the \*OH intermediate.

**Table S2.** Energetic evaluation of the mononuclear mechanism on the fully hydroxylated IrO<sub>2</sub>(110) surface (cf. **Figure 1b** in the main text) by the framework of the descriptor  $G_{\max}(U)$ . The table indicates the free-energy changes of each step at  $U = 0$  V vs. RHE and  $G_{\max}(U)$  values at different applied electrode potentials ( $U$ ).

| $\Delta G_1$<br>[eV] | $\Delta G_2$<br>[eV] | $\Delta G_3$<br>[eV] | $\Delta G_4$<br>[eV] | $G_{\max}(U)$<br>[eV] |        |        |        |        |
|----------------------|----------------------|----------------------|----------------------|-----------------------|--------|--------|--------|--------|
|                      |                      |                      |                      | 1.23 V                | 1.33 V | 1.43 V | 1.53 V | 1.63 V |
| -0.53                | 1.65                 | 1.44                 | 2.36                 | 1.76                  | 1.46   | 1.16   | 0.86   | 0.73   |

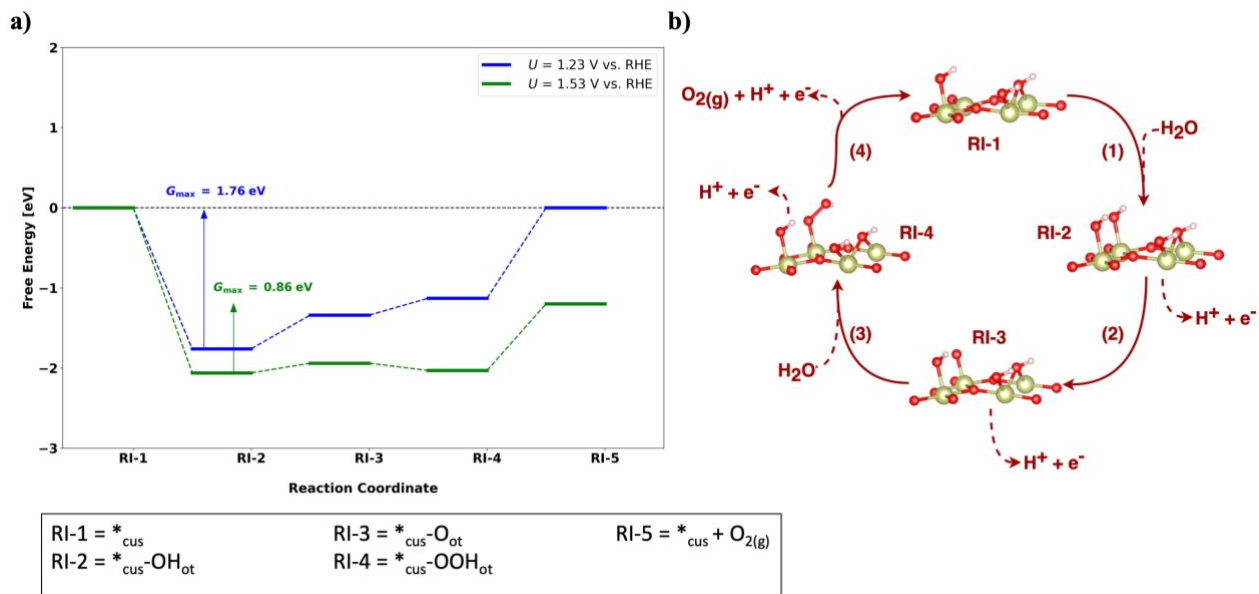

**Figure S4. a)** Free-energy diagram for the mononuclear mechanism on the fully hydroxylated  $\text{IrO}_2(110)$  surface at 1.23 V and 1.53 V vs. RHE. The reaction intermediates of the mechanistic cycle are labeled on the x-axis. Blue and green solid lines indicate intermediates' free energies at 1.23 V and 1.53 V, respectively. Colored arrows indicate the free-energy span governing  $G_{\max}(U)$ , with the respective value displayed.

**b)** Schematic illustration of the mononuclear mechanism, as described in Section 3.1, on the fully hydroxylated  $\text{IrO}_2(110)$  surface. Numbers next to the arrows indicate the step sequence, and each structure represents the corresponding reaction intermediate.

## 4.2 Bifunctional I mechanism

While the first two steps of the bifunctional I mechanism are identical to the mononuclear pathway, the third and fourth steps differ compared to the mononuclear description (cf. section 3.2 or **Figure S5b**). **Table S3** compiles the free-energy changes for each elementary step at  $U = 0$  V vs. RHE and the activity descriptor  $G_{\max}(U)$  at different applied electrode potentials under OER conditions. The corresponding free-energy diagram is depicted in **Figure S5a**. Similar to the mononuclear mechanism, the descriptor  $G_{\max}(U)$  is governed by the span  $^*_{\text{cus}}\text{-OH}_{\text{ot}} + \text{O}_{\text{br}} \rightarrow ^*_{\text{cus}}\text{-O}_{\text{ot}} + \text{O}_{\text{br}} \rightarrow ^*_{\text{cus}}\text{-OO}_{\text{ot}} + \text{OH}_{\text{br}} \rightarrow ^*_{\text{cus}} + \text{O}_{\text{br}} + \text{O}_2$  in the potential range of 1.23 V to 1.53 V vs. RHE.

**Table S3.** Energetic evaluation of the bifunctional I mechanism on the fully hydroxylated  $\text{IrO}_2(110)$  surface (cf. **Figure 1b** in the main text) by the framework of the descriptor  $G_{\max}(U)$ . The table indicates the free-energy changes of each step at  $U = 0$  V vs. RHE and  $G_{\max}(U)$  values at different applied electrode potentials ( $U$ ).

| $\Delta G_1$<br>[eV] | $\Delta G_2$<br>[eV] | $\Delta G_3$<br>[eV] | $\Delta G_4$<br>[eV] | $G_{\max}(U)$<br>[eV] |        |        |        |        |
|----------------------|----------------------|----------------------|----------------------|-----------------------|--------|--------|--------|--------|
|                      |                      |                      |                      | 1.23 V                | 1.33 V | 1.43 V | 1.53 V | 1.63 V |
| -0.24                | 1.66                 | 1.42                 | 2.09                 | 1.47                  | 1.17   | 0.87   | 0.57   | 0.46   |

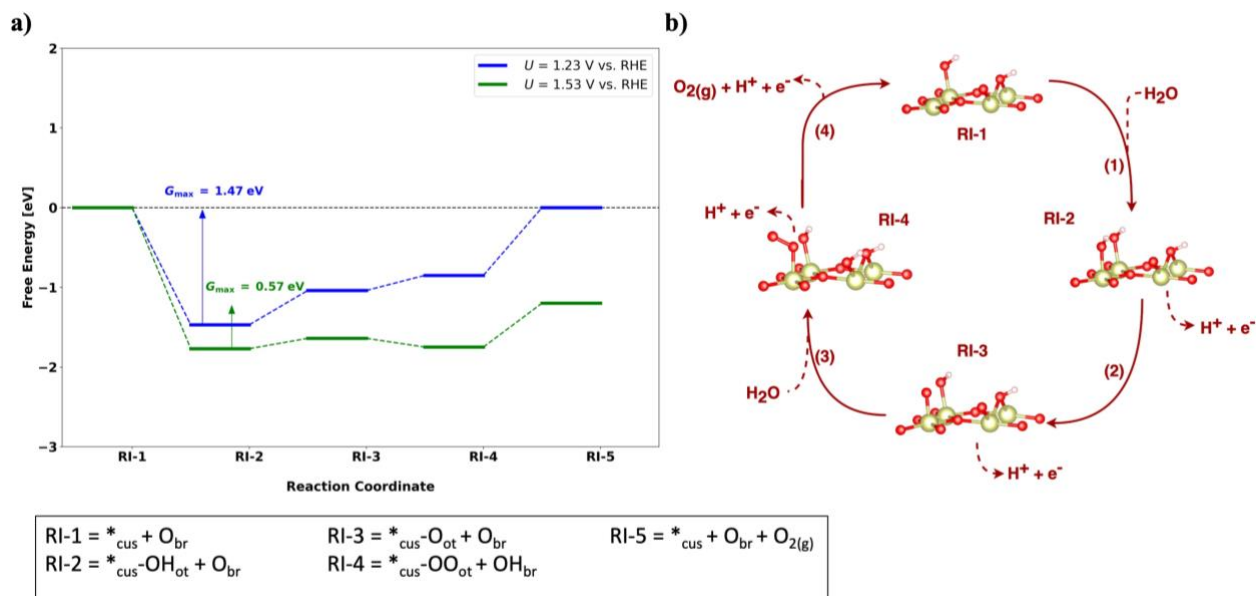

**Figure S5. a)** Free-energy diagram for the bifunctional I mechanism on the fully hydroxylated  $\text{IrO}_2(110)$  surface at 1.23 V and 1.53 V vs. RHE. The reaction intermediates of the mechanistic cycle are labeled on the x-axis. Blue and green solid lines indicate intermediates' free energies at 1.23 V and 1.53 V, respectively. Colored arrows indicate the free-energy span governing  $G_{\max}(U)$ , with the respective value displayed.

**b)** Schematic illustration of the bifunctional I mechanism, as described in Section 3.2, on the fully hydroxylated  $\text{IrO}_2(110)$  surface. Numbers next to the arrows indicate the step sequence, and each structure represents the corresponding reaction intermediate.

### 4.3 Bifunctional II mechanism

In the bifunctional II mechanism, the  $*\text{OOH}$  intermediate is formed by a chemical rather than an electrochemical reaction step (cf. section 3.3 or **Figure S6b**). **Table S4** compiles the free-energy changes for each elementary step at  $U = 0 \text{ V}$  vs. RHE and the activity descriptor  $G_{\max}(U)$  at different applied electrode potentials under OER conditions. The corresponding free-energy diagram is depicted in **Figure S6a**. Similar to the mononuclear mechanism, the descriptor  $G_{\max}(U)$  is governed by the span  $*_{\text{cus}}\text{-OH}_{\text{ot}} + \text{O}_{\text{br}} \rightarrow *_{\text{cus}}\text{-O}_{\text{ot}} + \text{O}_{\text{br}} \rightarrow *_{\text{cus}}\text{-OOH}_{\text{ot}} + \text{OH}_{\text{br}} \rightarrow *_{\text{cus}}\text{-OOH}_{\text{ot}} + \text{O}_{\text{br}} \rightarrow *_{\text{cus}} + \text{O}_{\text{br}} + \text{O}_2$  in the potential range of 1.23 V to 1.53 V vs. RHE.

**Table S4.** Energetic evaluation of the bifunctional II mechanism on the fully hydroxylated  $\text{IrO}_2(110)$  surface (cf. **Figure 1b** in the main text) by the framework of the descriptor  $G_{\max}(U)$ . The table indicates the free-energy changes of each step at  $U = 0 \text{ V}$  vs. RHE and  $G_{\max}(U)$  values at different applied electrode potentials ( $U$ ).

| $\Delta G_1$<br>[eV] | $\Delta G_2$<br>[eV] | $\Delta G_3$<br>[eV] | $\Delta G_4$<br>[eV] | $\Delta G_5$<br>[eV] | $G_{\max}(U)$<br>[eV] |        |        |        |        |
|----------------------|----------------------|----------------------|----------------------|----------------------|-----------------------|--------|--------|--------|--------|
|                      |                      |                      |                      |                      | 1.23 V                | 1.33 V | 1.43 V | 1.53 V | 1.63 V |
| -0.24                | 1.66                 | 0.39                 | 1.01                 | 2.11                 | 1.47                  | 1.17   | 0.87   | 0.57   | 0.48   |

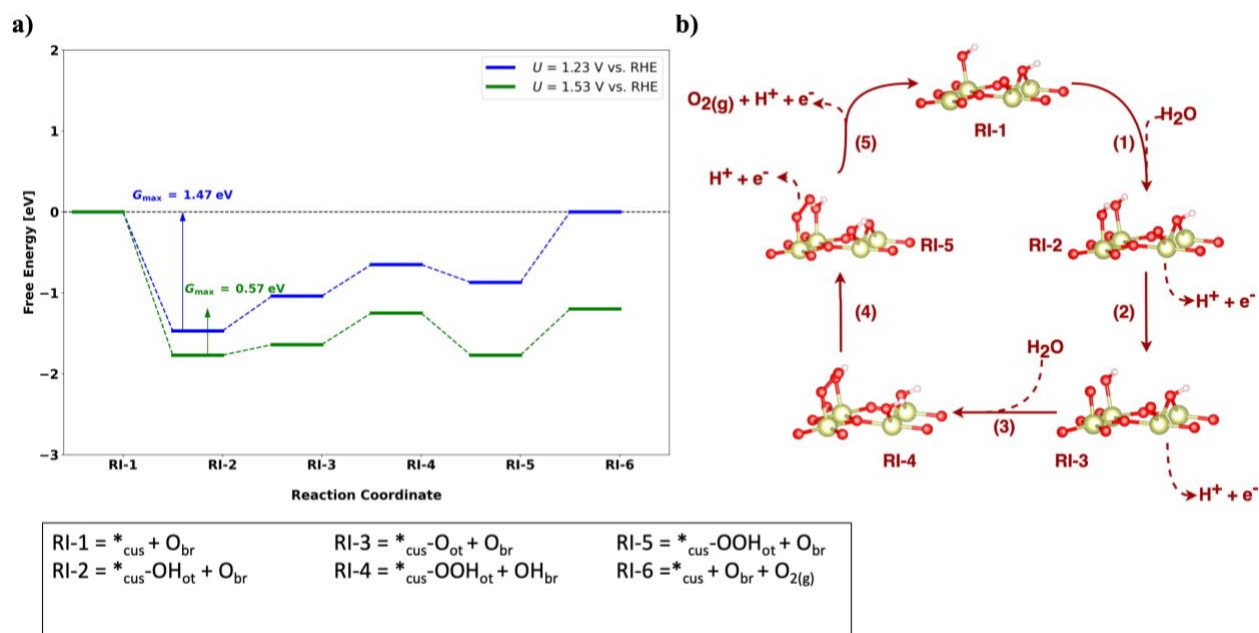

**Figure S6. a)** Free-energy diagram for the bifunctional II mechanism on the fully hydroxylated  $\text{IrO}_2(110)$  surface at 1.23 V and 1.53 V vs. RHE. The reaction intermediates of the mechanistic cycle are labeled on the x-axis. Blue and green solid lines indicate intermediates' free energies at 1.23 V and 1.53 V, respectively. Colored arrows indicate the free-energy span governing  $G_{\text{max}}(U)$ , with the respective value displayed.

**b)** Schematic illustration of the bifunctional II mechanism, as described in Section 3.3, on the fully hydroxylated  $\text{IrO}_2(110)$  surface. Numbers next to the arrows indicate the step sequence, and each structure represents the corresponding reaction intermediate.

#### 4.4 Oxide Mechanism

The oxide mechanism requires complete oxygen coverage at the cus sites (cf. section 3.4). Even if we consider that initially, the  $^{*}\text{OH}$  adsorbates are transformed to  $^{*}\text{O}$ , we observe that one of the intermediate structures in the oxide pathway containing the  $^{*}\text{OOH}$  adsorbate is unstable. Therefore, we conclude that the oxide mechanism is unlikely for the fully hydroxylated  $\text{IrO}_2(110)$  surface.

#### 4.5 Binuclear Mechanism

The binuclear mechanism consists of the chemical recombination of two neighboring  $^{*}\text{O}$  adsorbates (cf. section 3.5 or **Figure S7b**). **Table S5** compiles the free-energy changes for each elementary step at  $U = 0$  V vs. RHE and the activity descriptor  $G_{\text{max}}(U)$  at different applied electrode potentials under OER conditions. The corresponding free-energy diagram is depicted in **Figure S7a**. Similar to the mononuclear mechanism, the descriptor  $G_{\text{max}}(U)$  is governed by the free-energy span of the  $^{*}\text{OH}$  intermediate to the product  $\text{O}_2$  in the potential range of 1.23 V to 1.53 V vs. RHE.

**Table S5.** Energetic evaluation of the binuclear mechanism on the fully hydroxylated IrO<sub>2</sub>(110) surface (cf. **Figure 1b** in the main text) by the framework of the descriptor  $G_{\max}(U)$ . The table indicates the free-energy changes of each step at  $U = 0$  V vs. RHE and  $G_{\max}(U)$  values at different applied electrode potentials ( $U$ ).

| $\Delta G_1$<br>[eV] | $\Delta G_2$<br>[eV] | $\Delta G_3$<br>[eV] | $\Delta G_4$<br>[eV] | $\Delta G_5$<br>[eV] | $G_{\max}(U)$<br>[eV] |        |        |        |        |
|----------------------|----------------------|----------------------|----------------------|----------------------|-----------------------|--------|--------|--------|--------|
|                      |                      |                      |                      |                      | 1.23 V                | 1.33 V | 1.43 V | 1.53 V | 1.63 V |
| -0.47                | -0.53                | 1.65                 | 1.65                 | 2.62                 | 3.46                  | 3.26   | 3.06   | 2.86   | 2.66   |

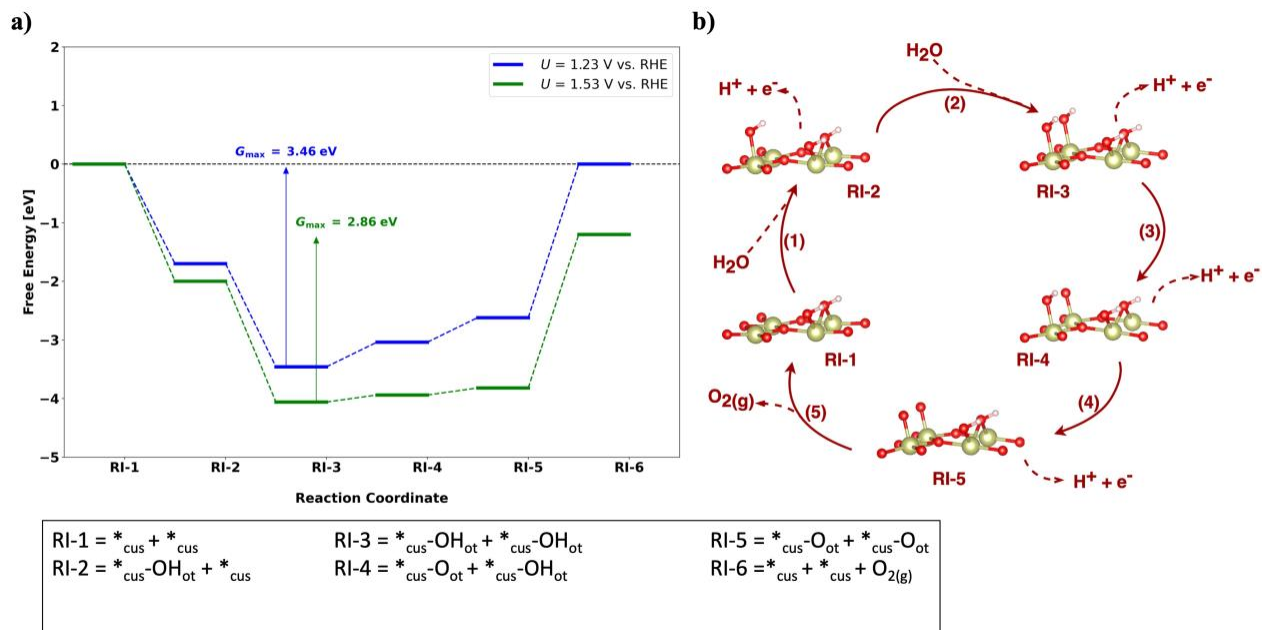

**Figure S7. Aa** Free-energy diagram for the binuclear mechanism on the fully hydroxylated IrO<sub>2</sub>(110) surface at 1.23 V and 1.53 V vs. RHE. The reaction intermediates of the mechanistic cycle are labeled on the x-axis. Blue and green solid lines indicate intermediates' free energies at 1.23 V and 1.53 V, respectively. Colored arrows indicate the free-energy span governing  $G_{\max}(U)$ , with the respective value displayed.

**b)** Schematic illustration of the binuclear mechanism, as described in Section 3.5, on the fully hydroxylated IrO<sub>2</sub>(110) surface. Numbers next to the arrows indicate the step sequence, and each structure represents the corresponding reaction intermediate.

#### 4.6 Assessment of solvation effects by VASPsol

Electrocatalytic reactions such as the OER take place at electrified solid/ liquid interfaces, indicating that the aqueous solvent may have a non-negligible effect on the energetics of the electrochemical process. Despite this, there is no unifying framework of how to account for the surrounding aqueous phase in DFT calculations. While Chan and coworkers<sup>33</sup> reported that the application of continuum solvation methods do not necessarily provide more accurate energetics than gas-phase DFT calculations, we qualitatively assess the impact of solvation on the mononuclear OER by an implicit description as implemented in the VASPsol package.<sup>10,11</sup> **Table S6** compiles the calculated free-energy changes neglecting or including solvation, their differences, and the difference in the activity descriptor  $G_{\max}(U)$ . While the quantitative impact of solvation on the free-energy changes does not exceed 0.20 eV, it is evident that the value of the activity descriptor  $G_{\max}(U)$  remains virtually constant. This finding suggests that, for the fully

hydroxylated IrO<sub>2</sub>(110) surface, gas-phase DFT calculations provide a reliable energetic representation of the OER.

**Table S6.** Comparing the energetics of gas-phase DFT calculations and DFT including implicit solvation by means of VASPsol for the elementary steps of the mononuclear OER mechanism on the fully hydroxylated IrO<sub>2</sub>(110) surface. Note that  $\Delta\Delta G_j$  ( $j = 1, 2, 3, 4$ ) indicates the free-energy difference of the free-energy changes for the continuum solvation approach and gas-phase DFT. Likewise,  $\Delta G_{\max}(U)$  denotes the difference in the activity descriptor  $G_{\max}(U)$  for the continuum solvation approach and gas-phase DFT.

|                                                                                      |                    |                    |                    | $\Delta G_1$<br>[eV]                                                                                         | $\Delta G_2$<br>[eV] | $\Delta G_3$<br>[eV] | $\Delta G_4$<br>[eV] |        |
|--------------------------------------------------------------------------------------|--------------------|--------------------|--------------------|--------------------------------------------------------------------------------------------------------------|----------------------|----------------------|----------------------|--------|
| Gas-phase DFT                                                                        |                    |                    |                    | -0.53                                                                                                        | 1.65                 | 1.44                 | 2.36                 |        |
| DFT + VASPsol                                                                        |                    |                    |                    | -0.50                                                                                                        | 1.46                 | 1.61                 | 2.35                 |        |
| $\Delta\Delta G_j = \Delta G_{j; \text{VASPsol}} - \Delta G_{j; \text{gas}}$<br>[eV] |                    |                    |                    | $\Delta G_{\text{max}}(U) = (G_{\text{max}}(U))_{\text{VASPsol}} - (G_{\text{max}}(U))_{\text{gas}}$<br>[eV] |                      |                      |                      |        |
| $\Delta\Delta G_1$                                                                   | $\Delta\Delta G_2$ | $\Delta\Delta G_3$ | $\Delta\Delta G_4$ | 1.23 V                                                                                                       | 1.33 V               | 1.43 V               | 1.53 V               | 1.63 V |
| 0.03                                                                                 | -0.19              | 0.17               | -0.01              | -0.03                                                                                                        | -0.03                | -0.03                | 0.04                 | -0.01  |

## 5 OER over the partly hydroxylated IrO<sub>2</sub>(110) surface

### 5.1 Mononuclear Mechanism

**Table S7** compiles the free-energy changes for each elementary step at  $U = 0$  V vs. RHE and the activity descriptor  $G_{\max}(U)$  at different applied electrode potentials under OER conditions. The corresponding free-energy diagram is depicted in **Figure S8a**, with a visual representation of the elementary steps in **Figure S8b**. While the activity descriptor  $G_{\max}(U)$  is governed by the span  $^*\text{cus-OH}_{\text{ot}} \rightarrow ^*\text{cus-O}_{\text{ot}} \rightarrow ^*\text{cus-OOH}_{\text{ot}} \rightarrow ^*\text{cus} + \text{O}_2$  at  $U = 1.23$  V vs. RHE, the limiting free-energy span switches to  $^*\text{cus-OOH}_{\text{ot}} \rightarrow ^*\text{cus} + \text{O}_2$  for larger applied overpotentials ( $U = 1.53$  V vs. RHE).

**Table S7.** Energetic evaluation of the mononuclear mechanism on the partly hydroxylated IrO<sub>2</sub>(110) surface (cf. **Figure 1c** in the main text) by the framework of the descriptor  $G_{\max}(U)$ . The table indicates the free-energy changes of each step at  $U = 0$  V vs. RHE and  $G_{\max}(U)$  values at different applied electrode potentials ( $U$ ).

| $\Delta G_1$<br>[eV] | $\Delta G_2$<br>[eV] | $\Delta G_3$<br>[eV] | $\Delta G_4$<br>[eV] | $G_{\max}(U)$<br>[eV] |        |        |        |        |
|----------------------|----------------------|----------------------|----------------------|-----------------------|--------|--------|--------|--------|
|                      |                      |                      |                      | 1.23 V                | 1.33 V | 1.43 V | 1.53 V | 1.63 V |
| -0.22                | 1.75                 | 1.11                 | 2.27                 | 1.45                  | 1.15   | 0.85   | 0.75   | 0.65   |



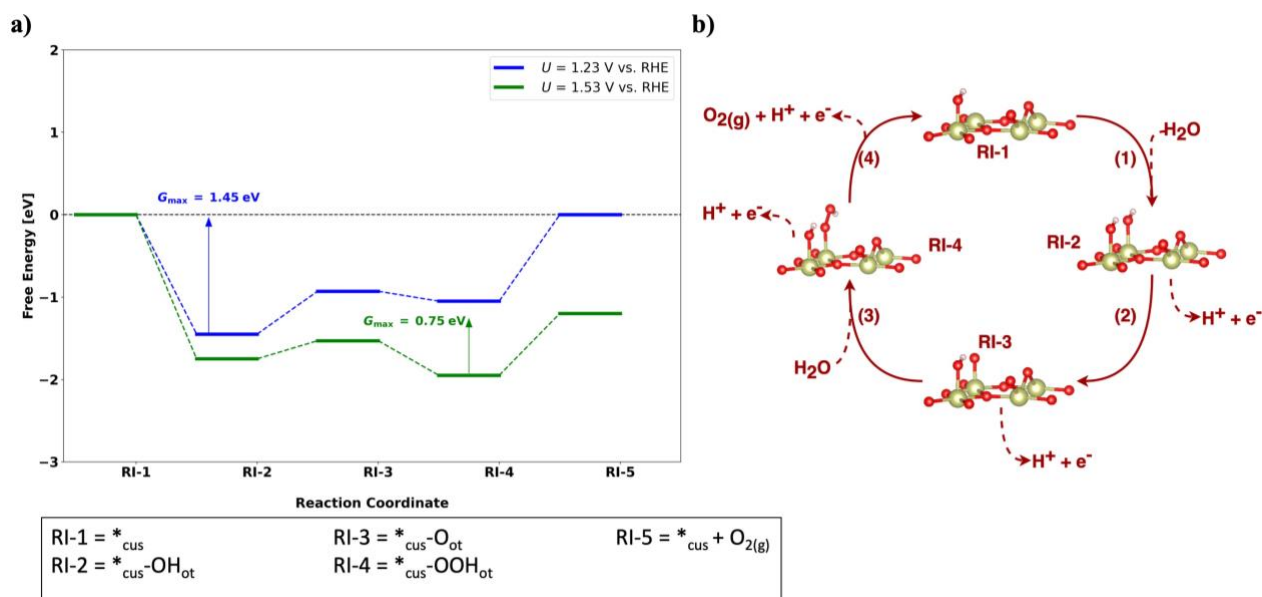

**Figure S8. a)** Free-energy diagram for the mononuclear mechanism on the partly hydroxylated  $\text{IrO}_2(110)$  surface at 1.23 V and 1.53 V vs. RHE. The reaction intermediates of the mechanistic cycle are labeled on the x-axis. Blue and green solid lines indicate intermediates' free energies at 1.23 V and 1.53 V, respectively. Colored arrows indicate the free-energy span governing  $G_{\max}(U)$ , with the respective value displayed.

**b)** Schematic illustration of the mononuclear mechanism, as described in Section 3.1, on the partly hydroxylated  $\text{IrO}_2(110)$  surface. Numbers next to the arrows indicate the step sequence, and each structure represents the corresponding reaction intermediate.

## 5.2 Bifunctional I mechanism

**Table S8** compiles the free-energy changes for each elementary step at  $U = 0$  V vs. RHE and the activity descriptor  $G_{\max}(U)$  at different applied electrode potentials under OER conditions. The corresponding free-energy diagram is depicted in **Figure S9a**. Similar to the mononuclear mechanism, the activity descriptor  $G_{\max}(U)$  is governed by the span  $^{*}_{\text{cus}}\text{-OH}_{\text{ot}} + \text{O}_{\text{br}} \rightarrow ^{*}_{\text{cus}}\text{-O}_{\text{ot}} + \text{O}_{\text{br}} \rightarrow ^{*}_{\text{cus}}\text{-OO}_{\text{ot}} + \text{OH}_{\text{br}} \rightarrow ^{*}_{\text{cus}} + \text{O}_{\text{br}} + \text{O}_2$  at  $U = 1.23$  V vs. RHE, whereas the limiting free-energy span switches to  $^{*}_{\text{cus}}\text{-OO}_{\text{ot}} + \text{OH}_{\text{br}} \rightarrow ^{*}_{\text{cus}} + \text{O}_{\text{br}} + \text{O}_2$  for larger applied overpotentials ( $U = 1.53$  V vs. RHE).

**Table S8.** Energetic evaluation of the bifunctional I mechanism on the partly hydroxylated  $\text{IrO}_2(110)$  surface (cf. **Figure 1c** in the main text) by the framework of the descriptor  $G_{\max}(U)$ . The table indicates the free-energy changes of each step at  $U = 0$  V vs. RHE and  $G_{\max}(U)$  values at different applied electrode potentials ( $U$ ).

| $\Delta G_1$<br>[eV] | $\Delta G_2$<br>[eV] | $\Delta G_3$<br>[eV] | $\Delta G_4$<br>[eV] | $G_{\max}(U)$<br>[eV] |        |        |        |        |
|----------------------|----------------------|----------------------|----------------------|-----------------------|--------|--------|--------|--------|
|                      |                      |                      |                      | 1.23 V                | 1.33 V | 1.43 V | 1.53 V | 1.63 V |
| -0.22                | 1.75                 | 1.18                 | 2.21                 | 1.45                  | 1.15   | 0.85   | 0.68   | 0.58   |



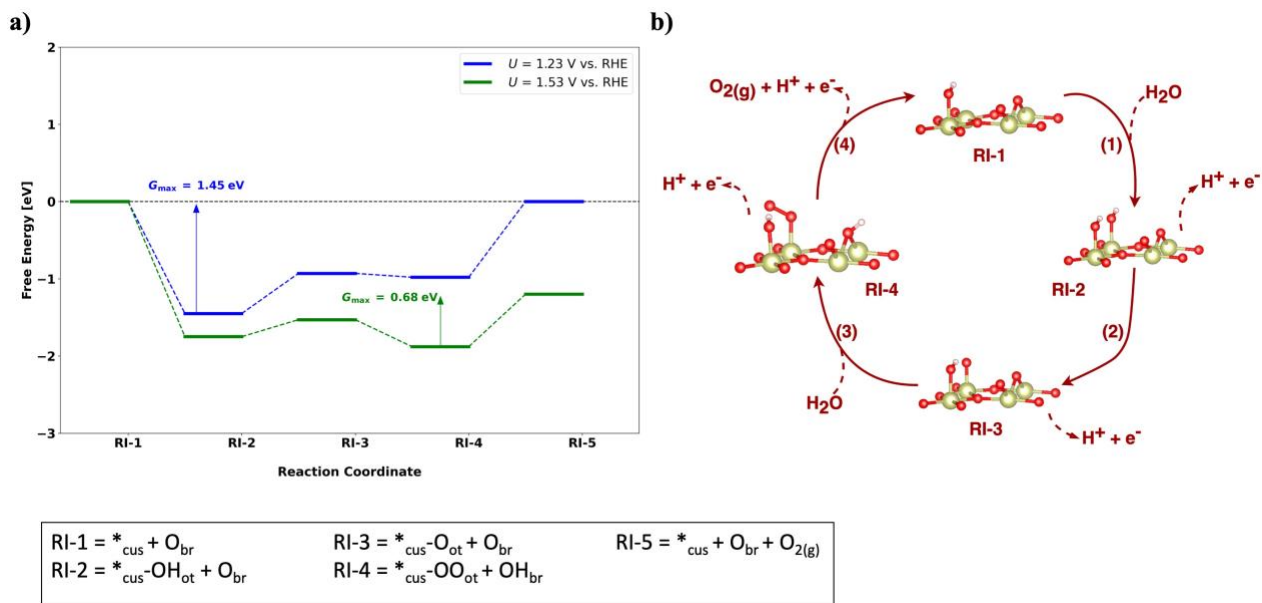

**Figure S9. a)** Free-energy diagram for the bifunctional I mechanism on the partly hydroxylated  $\text{IrO}_2(110)$  surface at 1.23 V and 1.53 V vs. RHE. The reaction intermediates of the mechanistic cycle are labeled on the x-axis. Blue and green solid lines indicate intermediates' free energies at 1.23 V and 1.53 V, respectively. Colored arrows indicate the free-energy span governing  $G_{\text{max}}(U)$ , with the respective value displayed.

**b)** Schematic illustration of the bifunctional I mechanism, as described in Section 3.2, on the partly hydroxylated  $\text{IrO}_2(110)$  surface. Numbers next to the arrows indicate the step sequence, and each structure represents the corresponding reaction intermediate.

### 5.3 Bifunctional II mechanism

**Table S9** compiles the free-energy changes for each elementary step at  $U = 0$  V vs. RHE and the activity descriptor  $G_{\text{max}}(U)$  at different applied electrode potentials under OER conditions. The corresponding free-energy diagram is depicted in **Figure S10a**. Similar to the mononuclear mechanism, the activity descriptor  $G_{\text{max}}(U)$  is governed by the span  $*_{\text{cus}}\text{-OH}_{\text{ot}} + \text{O}_{\text{br}} \rightarrow *_{\text{cus}}\text{-O}_{\text{ot}} + \text{O}_{\text{br}} \rightarrow *_{\text{cus}}\text{-OOH}_{\text{ot}} + \text{OH}_{\text{br}} \rightarrow *_{\text{cus}}\text{-OOH}_{\text{ot}} + \text{O}_{\text{br}} \rightarrow *_{\text{cus}} + \text{O}_{\text{br}} + \text{O}_2$  at  $U = 1.23$  V vs. RHE, whereas the limiting free-energy span switches to  $*_{\text{cus}}\text{-OOH}_{\text{ot}} + \text{O}_{\text{br}} \rightarrow *_{\text{cus}} + \text{O}_{\text{br}} + \text{O}_2$  for more anodic conditions ( $U = 1.53$  V vs. RHE).

**Table S9.** Energetic evaluation of the bifunctional II mechanism on the partly hydroxylated  $\text{IrO}_2(110)$  surface (cf. **Figure 1c** in the main text) by the framework of the descriptor  $G_{\text{max}}(U)$ . The table indicates the free-energy changes of each step at  $U = 0$  V vs. RHE and  $G_{\text{max}}(U)$  values at different applied electrode potentials ( $U$ ).

| $\Delta G_1$<br>[eV] | $\Delta G_2$<br>[eV] | $\Delta G_3$<br>[eV] | $\Delta G_4$<br>[eV] | $\Delta G_5$<br>[eV] | $G_{\text{max}}(U)$<br>[eV] |        |        |        |        |
|----------------------|----------------------|----------------------|----------------------|----------------------|-----------------------------|--------|--------|--------|--------|
|                      |                      |                      |                      |                      | 1.23 V                      | 1.33 V | 1.43 V | 1.53 V | 1.63 V |
| -0.22                | 1.75                 | 0.00                 | 1.11                 | 2.28                 | 1.45                        | 1.15   | 0.85   | 0.75   | 0.65   |

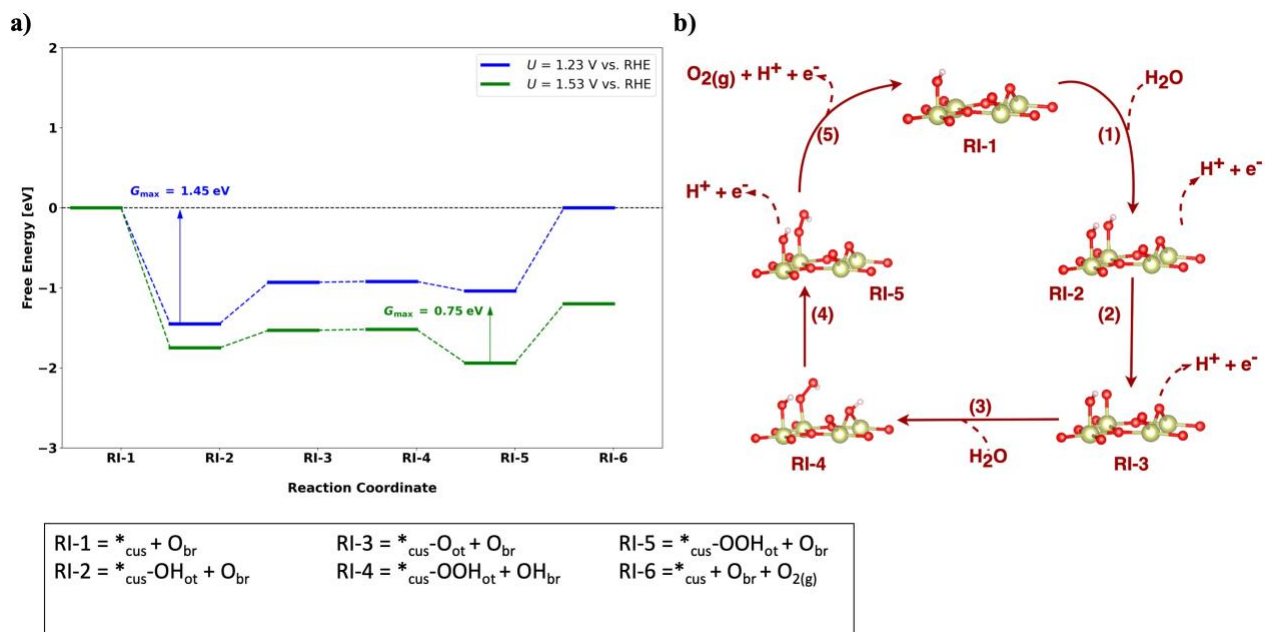

**Figure S10. a)** Free-energy diagram for the bifunctional II mechanism on the partly hydroxylated  $\text{IrO}_2(110)$  surface at 1.23 V and 1.53 V vs. RHE. The reaction intermediates of the mechanistic cycle are labeled on the x-axis. Blue and green solid lines indicate intermediates' free energies at 1.23 V and 1.53 V, respectively. Colored arrows indicate the free-energy span governing  $G_{\max}(U)$ , with the respective value displayed.

**b)** Schematic illustration of the bifunctional II mechanism, as described in Section 3.3, on the partly hydroxylated  $\text{IrO}_2(110)$  surface. Numbers next to the arrows indicate the step sequence, and each structure represents the corresponding reaction intermediate.

## 5.4 Oxide Mechanism

In contrast to the fully hydroxylated  $\text{IrO}_2(110)$  surface, we observe that the oxide mechanism (cf. section 3.4 or **Figure S11b**) can take place in a partly hydroxylated environment of the active site. **Table S10** compiles the free-energy changes for each elementary step at  $U = 0$  V vs. RHE and the activity descriptor  $G_{\max}(U)$  at different applied electrode potentials under OER conditions. The corresponding free-energy diagram is depicted in **Figure S11a**. In contrast to the other mechanisms, the activity descriptor  $G_{\max}(U)$  is governed by the formation rather than the decomposition of the  $*\text{OOH}$  intermediate from the  $*\text{O}$ -covered surface.

**Table S10.** Energetic evaluation of the oxide mechanism on the partly hydroxylated  $\text{IrO}_2(110)$  surface (cf. **Figure 1c** in the main text) by the framework of the descriptor  $G_{\max}(U)$ . The table indicates the free-energy changes of each step at  $U = 0$  V vs. RHE and  $G_{\max}(U)$  values at different applied electrode potentials ( $U$ ).

| $\Delta G_1$<br>[eV] | $\Delta G_2$<br>[eV] | $\Delta G_3$<br>[eV] | $\Delta G_4$<br>[eV] | $\Delta G_5$<br>[eV] | $G_{\max}(U)$<br>[eV] |        |        |        |        |
|----------------------|----------------------|----------------------|----------------------|----------------------|-----------------------|--------|--------|--------|--------|
|                      |                      |                      |                      |                      | 1.23 V                | 1.33 V | 1.43 V | 1.53 V | 1.63 V |
| 1.33                 | 2.19                 | 0.71                 | 0.67                 | 0.01                 | 1.07                  | 0.87   | 0.76   | 0.66   | 0.56   |

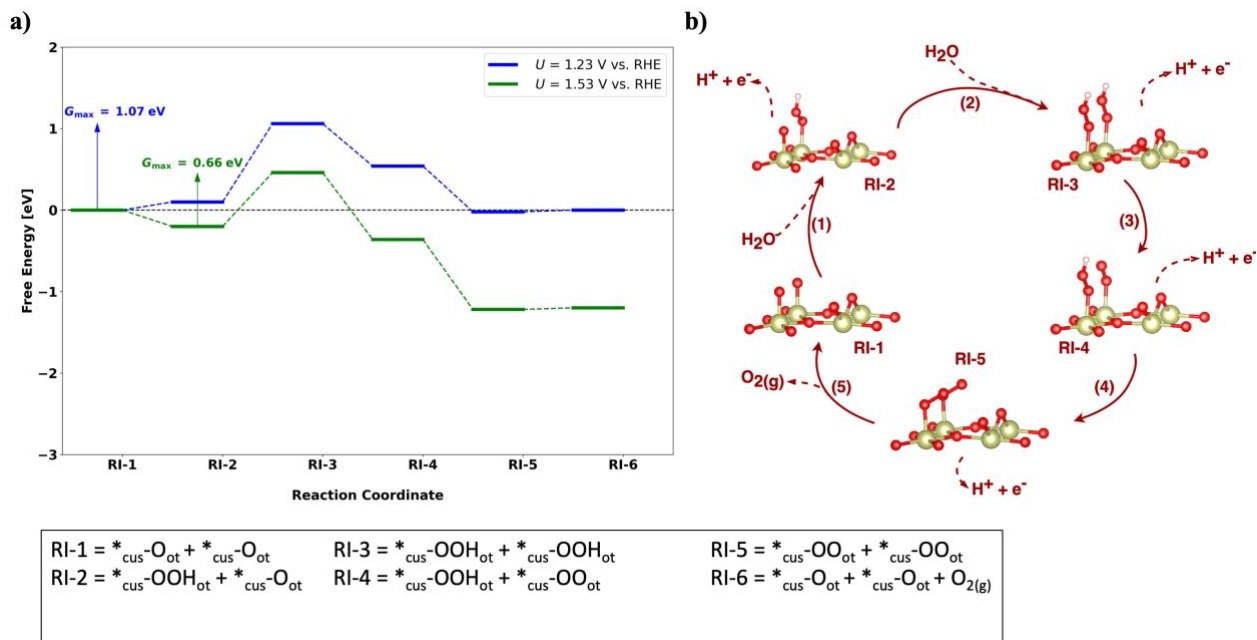

**Figure S11. a)** Free-energy diagram for the oxide mechanism on the partly hydroxylated  $\text{IrO}_2(110)$  surface at 1.23 V and 1.53 V vs. RHE. The reaction intermediates of the mechanistic cycle are labeled on the x-axis. Blue and green solid lines indicate intermediates' free energies at 1.23 V and 1.53 V, respectively. Colored arrows indicate the free-energy span governing  $G_{\text{max}}(U)$ , with the respective value displayed.

**b)** Schematic illustration of the oxide mechanism, as described in Section 3.4, on the partly hydroxylated  $\text{IrO}_2(110)$  surface. Numbers next to the arrows indicate the step sequence, and each structure represents the corresponding reaction intermediate.

## 5.5 Binuclear Mechanism

**Table S11** compiles the free-energy changes for each elementary step at  $U = 0$  V vs. RHE and the activity descriptor  $G_{\text{max}}(U)$  at different applied electrode potentials under OER conditions. The corresponding free-energy diagram is depicted in **Figure S12a**. In the potential range of 1.23 V to 1.53 V vs. RHE, the descriptor  $G_{\text{max}}(U)$  is governed by the free-energy span of the  $\text{*OH}$  intermediate to the product  $\text{O}_2$ .

**Table S11.** Energetic evaluation of the binuclear mechanism on the partly hydroxylated  $\text{IrO}_2(110)$  surface (cf. **Figure 1c** in the main text) by the framework of the descriptor  $G_{\text{max}}(U)$ . The table indicates the free-energy changes of each step at  $U = 0$  V vs. RHE and  $G_{\text{max}}(U)$  values at different applied electrode potentials ( $U$ ).

| $\Delta G_1$<br>[eV] | $\Delta G_2$<br>[eV] | $\Delta G_3$<br>[eV] | $\Delta G_4$<br>[eV] | $\Delta G_5$<br>[eV] | $G_{\text{max}}(U)$<br>[eV] |        |        |        |        |
|----------------------|----------------------|----------------------|----------------------|----------------------|-----------------------------|--------|--------|--------|--------|
|                      |                      |                      |                      |                      | 1.23 V                      | 1.33 V | 1.43 V | 1.53 V | 1.63 V |
| -0.10                | -0.22                | 1.75                 | 1.66                 | 1.83                 | 2.78                        | 2.58   | 2.38   | 2.18   | 1.98   |

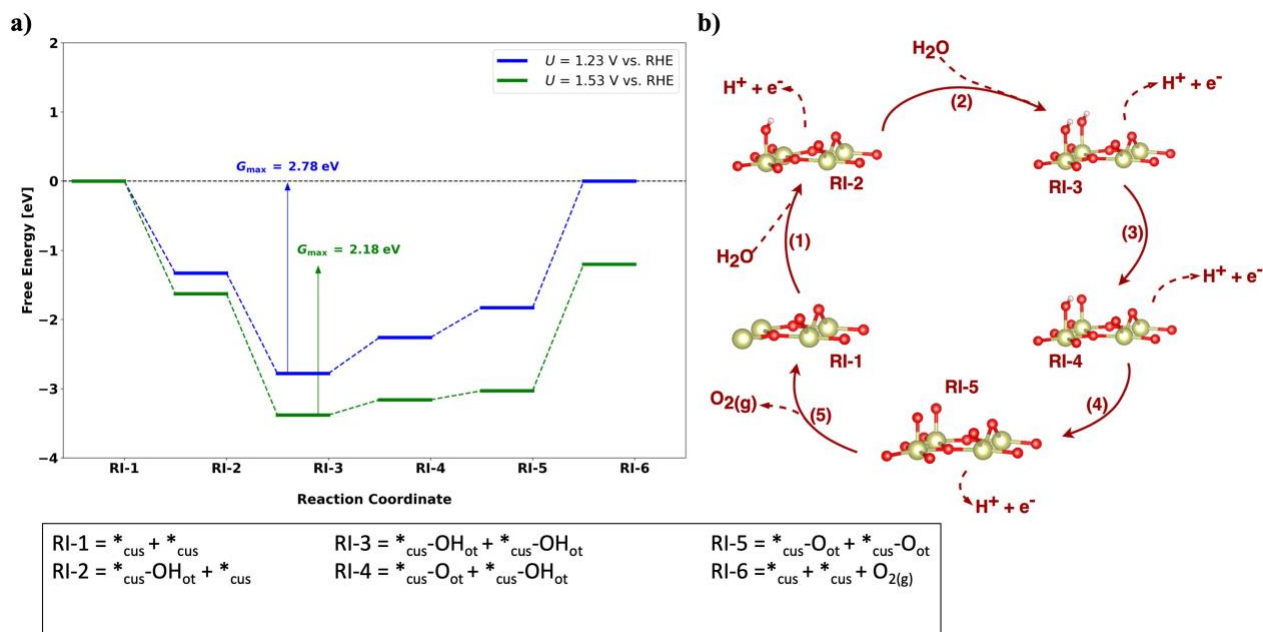

**Figure S12. a)** Free-energy diagram for the binuclear mechanism on the partly hydroxylated  $\text{IrO}_2(110)$  surface at 1.23 V and 1.53 V vs. RHE. The reaction intermediates of the mechanistic cycle are labeled on the x-axis. Blue and green solid lines indicate intermediates' free energies at 1.23 V and 1.53 V, respectively. Colored arrows indicate the free-energy span governing  $G_{\max}(U)$ , with the respective value displayed.

**b)** Schematic illustration of the binuclear mechanism, as described in Section 3.5, on the partly hydroxylated  $\text{IrO}_2(110)$  surface. Numbers next to the arrows indicate the step sequence, and each structure represents the corresponding reaction intermediate.

## 5.6 Assessment of solvation effects by VASPsol

**Table S12** compiles the calculated free-energy changes neglecting or including solvation, their differences, and the difference in the activity descriptor  $G_{\max}(U)$ . While the quantitative impact of solvation on the free-energy changes does not exceed 0.30 eV, the value of the activity descriptor  $G_{\max}(U)$  is particularly unchanged in the potential range of 1.23 V to 1.43 V vs. RHE.

**Table S12.** Comparing the energetics of gas-phase DFT calculations and DFT including implicit solvation by means of VASPsol for the elementary steps of the mononuclear OER mechanism on the partly hydroxylated  $\text{IrO}_2(110)$  surface. Note that  $\Delta\Delta G_j$  ( $j = 1, 2, 3, 4$ ) indicates the free-energy difference of the free-energy changes for the continuum solvation approach and gas-phase DFT. Likewise,  $\Delta G_{\max}(U)$  denotes the difference in the activity descriptor  $G_{\max}(U)$  for the continuum solvation approach and gas-phase DFT.

|                      | $\Delta G_1$<br>[eV] | $\Delta G_2$<br>[eV] | $\Delta G_3$<br>[eV] | $\Delta G_4$<br>[eV] |
|----------------------|----------------------|----------------------|----------------------|----------------------|
| <b>Gas-phase DFT</b> | -0.22                | 1.75                 | 1.11                 | 2.27                 |
| <b>DFT + VASPsol</b> | -0.21                | 1.55                 | 1.40                 | 2.18                 |

| $\Delta\Delta G_j = \Delta G_{j; \text{VASPsol}} - \Delta G_{j; \text{gas}}$<br>[eV] |                    |                    |                    | $\Delta G_{\text{max}}(U) = (G_{\text{max}}(U))_{\text{VASPsol}} - (G_{\text{max}}(U))_{\text{gas}}$<br>[eV] |        |        |        |        |
|--------------------------------------------------------------------------------------|--------------------|--------------------|--------------------|--------------------------------------------------------------------------------------------------------------|--------|--------|--------|--------|
| $\Delta\Delta G_1$                                                                   | $\Delta\Delta G_2$ | $\Delta\Delta G_3$ | $\Delta\Delta G_4$ | 1.23 V                                                                                                       | 1.33 V | 1.43 V | 1.53 V | 1.63 V |
| 0.01                                                                                 | -0.20              | 0.29               | -0.09              | -0.01                                                                                                        | -0.01  | -0.01  | -0.10  | -0.10  |

## 6 OER over the fully oxygen-covered IrO<sub>2</sub>(110) surface

### 6.1 Mononuclear mechanism

**Table S13** compiles the free-energy changes for each elementary step at  $U = 0$  V vs. RHE and the activity descriptor  $G_{\text{max}}(U)$  at different applied electrode potentials under OER conditions. The corresponding free-energy diagram is depicted in **Figure S13a**, with a visual representation of the elementary steps in **Figure S13b**. While the activity descriptor  $G_{\text{max}}(U)$  is governed by the span  $*_{\text{cus}}\text{-OH}_{\text{ot}} \rightarrow *_{\text{cus}}\text{-O}_{\text{ot}} \rightarrow *_{\text{cus}}\text{-OOH}_{\text{ot}} \rightarrow *_{\text{cus}} + \text{O}_2$  at  $U = 1.23$  V vs. RHE, the limiting free-energy span switches to  $*_{\text{cus}}\text{-OOH}_{\text{ot}} \rightarrow *_{\text{cus}} + \text{O}_2$  for larger applied overpotentials ( $U = 1.53$  V vs. RHE).

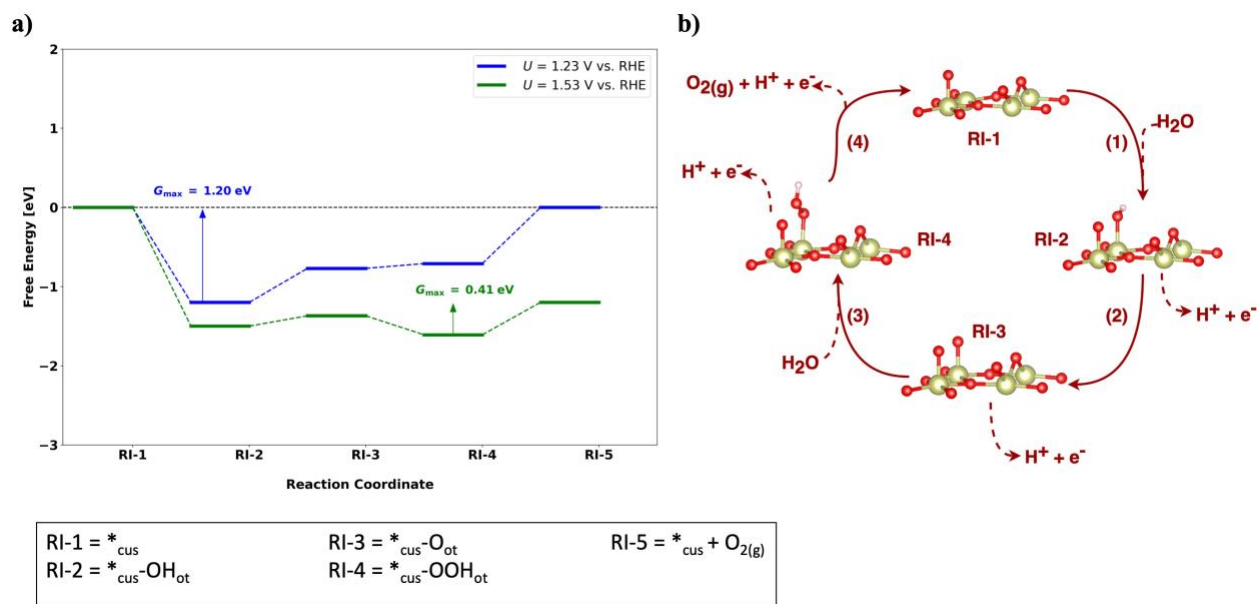

**Figure S13. a)** Free-energy diagram for the mononuclear mechanism on the fully oxygen-covered IrO<sub>2</sub>(110) surface at 1.23 V and 1.53 V vs. RHE. The reaction intermediates of the mechanistic cycle are labeled on the x-axis. Blue and green solid lines indicate intermediates' free energies at 1.23 V and 1.53 V, respectively. Colored arrows indicate the free-energy span governing  $G_{\text{max}}(U)$ , with the respective value displayed.

**b)** Schematic illustration of the mononuclear mechanism, as described in Section 3.1, on the fully oxygen-covered IrO<sub>2</sub>(110) surface. Numbers next to the arrows indicate the step sequence, and each structure represents the corresponding reaction intermediate.

**Table S13.** Energetic evaluation of the mononuclear mechanism on the fully oxygen-covered IrO<sub>2</sub>(110) surface (cf. **Figure 1d** in the main text) by the framework of the descriptor  $G_{\max}(U)$ . The table indicates the free-energy changes of each step at  $U = 0$  V vs. RHE and  $G_{\max}(U)$  values at different applied electrode potentials ( $U$ ).

| $\Delta G_1$<br>[eV] | $\Delta G_2$<br>[eV] | $\Delta G_3$<br>[eV] | $\Delta G_4$<br>[eV] | $G_{\max}(U)$<br>[eV] |      |      |      |      |
|----------------------|----------------------|----------------------|----------------------|-----------------------|------|------|------|------|
|                      |                      |                      |                      | 1.23                  | 1.33 | 1.43 | 1.53 | 1.63 |
| 0.03                 | 1.66                 | 1.29                 | 1.93                 | 1.20                  | 0.90 | 0.60 | 0.41 | 0.31 |

## 6.2 Bifunctional I mechanism

**Table S14** compiles the free-energy changes for each elementary step at  $U = 0$  V vs. RHE and the activity descriptor  $G_{\max}(U)$  at different applied electrode potentials under OER conditions. The corresponding free-energy diagram is depicted in **Figure S14a**. Similar to the mononuclear mechanism, the activity descriptor  $G_{\max}(U)$  is governed by the span  $^*\text{cus-OH}_{\text{ot}} + \text{O}_{\text{br}} \rightarrow ^*\text{cus-O}_{\text{ot}} + \text{O}_{\text{br}} \rightarrow ^*\text{cus-OO}_{\text{ot}} + \text{OH}_{\text{br}} \rightarrow ^*\text{cus} + \text{O}_{\text{br}} + \text{O}_2$  at  $U = 1.23$  V vs. RHE, whereas the limiting free-energy span switches to  $^*\text{cus-OO}_{\text{ot}} + \text{OH}_{\text{br}} \rightarrow ^*\text{cus} + \text{O}_{\text{br}} + \text{O}_2$  for larger applied overpotentials ( $U = 1.53$  V vs. RHE).

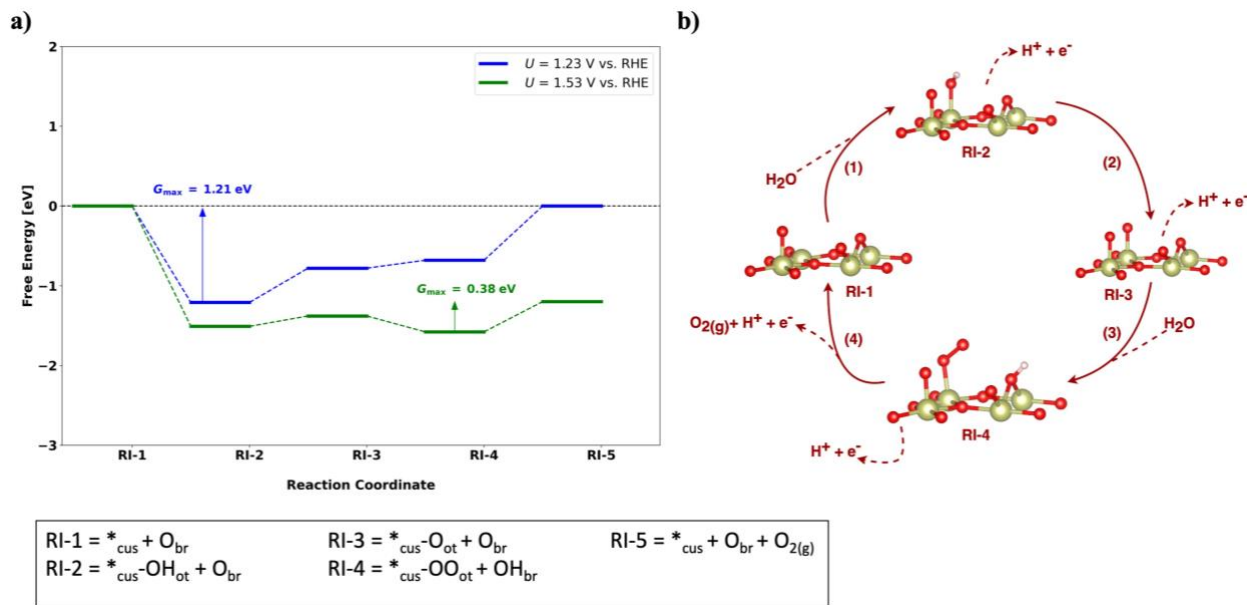

**Figure S14. a)** Free-energy diagram for the bifunctional I mechanism on the fully oxygen-covered IrO<sub>2</sub>(110) surface at 1.23 V and 1.53 V vs. RHE. The reaction intermediates of the mechanistic cycle are labeled on the x-axis. Blue and green solid lines indicate intermediates' free energies at 1.23 V and 1.53 V, respectively. Colored arrows indicate the free-energy span governing  $G_{\max}(U)$ , with the respective value displayed.

**b)** Schematic illustration of the bifunctional I mechanism, as described in Section 3.2, on the fully oxygen-covered IrO<sub>2</sub>(110) surface. Numbers next to the arrows indicate the step sequence, and each structure represents the corresponding reaction intermediate.



**Table S14.** Energetic evaluation of the bifunctional I mechanism on the fully oxygen-covered IrO<sub>2</sub>(110) surface (cf. **Figure 1d** in the main text) by the framework of the descriptor  $G_{\max}(U)$ . The table indicates the free-energy changes of each step at  $U = 0$  V vs. RHE and  $G_{\max}(U)$  values at different applied electrode potentials ( $U$ ).

| $\Delta G_1$<br>[eV] | $\Delta G_2$<br>[eV] | $\Delta G_3$<br>[eV] | $\Delta G_4$<br>[eV] | $G_{\max}(U)$<br>[eV] |      |      |      |      |
|----------------------|----------------------|----------------------|----------------------|-----------------------|------|------|------|------|
|                      |                      |                      |                      | 1.23                  | 1.33 | 1.43 | 1.53 | 1.63 |
| 0.02                 | 1.66                 | 1.33                 | 1.91                 | 1.21                  | 0.91 | 0.61 | 0.38 | 0.28 |

### 6.3 Bifunctional II mechanism

**Table S15** compiles the free-energy changes for each elementary step at  $U = 0$  V vs. RHE and the activity descriptor  $G_{\max}(U)$  at different applied electrode potentials under OER conditions. The corresponding free-energy diagram is depicted in **Figure S15a**. Similar to the other mechanisms, the activity descriptor  $G_{\max}(U)$  is governed by the span  $^*\text{cus-OH}_{\text{ot}} + \text{O}_{\text{br}} \rightarrow ^*\text{cus-O}_{\text{ot}} + \text{O}_{\text{br}} \rightarrow ^*\text{cus-OOH}_{\text{ot}} + \text{OH}_{\text{br}} \rightarrow ^*\text{cus-OOH}_{\text{ot}} + \text{O}_{\text{br}} \rightarrow ^*\text{cus} + \text{O}_{\text{br}} + \text{O}_2$  at  $U = 1.23$  V vs. RHE, whereas the limiting free-energy span switches to  $^*\text{cus-OOH}_{\text{ot}} + \text{O}_{\text{br}} \rightarrow ^*\text{cus} + \text{O}_{\text{br}} + \text{O}_2$  for more anodic conditions ( $U = 1.53$  V vs. RHE).

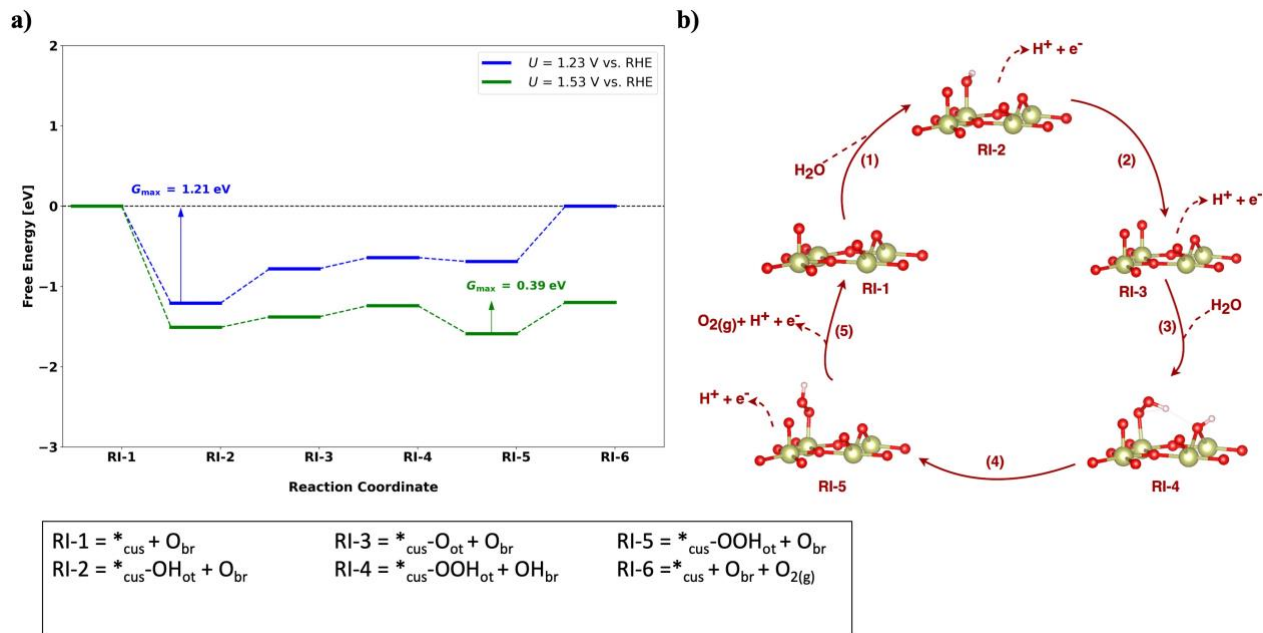

**Figure S15. a)** Free-energy diagram for the bifunctional II mechanism on the fully oxygen-covered IrO<sub>2</sub>(110) surface at 1.23 V and 1.53 V vs. RHE. The reaction intermediates of the mechanistic cycle are labeled on the x-axis. Blue and green solid lines indicate intermediates' free energies at 1.23 V and 1.53 V, respectively. Colored arrows indicate the free-energy span governing  $G_{\max}(U)$ , with the respective value displayed.

**b)** Schematic illustration of the bifunctional II mechanism, as described in Section 3.3, on the fully oxygen-covered IrO<sub>2</sub>(110) surface. Numbers next to the arrows indicate the step sequence, and each structure represents the corresponding reaction intermediate.

**Table S15.** Energetic evaluation of the bifunctional II mechanism on the fully oxygen-covered IrO<sub>2</sub>(110) surface (cf. **Figure 1d** in the main text) by the framework of the descriptor  $G_{\max}(U)$ . The table indicates the free-energy changes of each step at  $U = 0$  V vs. RHE and  $G_{\max}(U)$  values at different applied electrode potentials ( $U$ ).

| $\Delta G_1$<br>[eV] | $\Delta G_2$<br>[eV] | $\Delta G_3$<br>[eV] | $\Delta G_4$<br>[eV] | $\Delta G_5$<br>[eV] | $G_{\max}(U)$<br>[eV] |      |      |      |      |
|----------------------|----------------------|----------------------|----------------------|----------------------|-----------------------|------|------|------|------|
|                      |                      |                      |                      |                      | 1.23                  | 1.33 | 1.43 | 1.53 | 1.63 |
| 0.02                 | 1.66                 | 0.14                 | 1.18                 | 1.90                 | 1.21                  | 0.91 | 0.61 | 0.39 | 0.27 |

## 6.4 Oxide mechanism

**Table S16** compiles the free-energy changes for each elementary step at  $U = 0$  V vs. RHE and the activity descriptor  $G_{\max}(U)$  at different applied electrode potentials under OER conditions. The corresponding free-energy diagram is depicted in **Figure S16a**. In contrast to the other mechanisms, the activity descriptor  $G_{\max}(U)$  is governed by the formation rather than the decomposition of the \*OOH intermediate from the \*O-covered surface. We note that the obtained results are identical to the partly hydroxylated surface in section 5.4 due to the following reason: the partly hydroxylated phase first needs to be transformed into a fully oxygen-covered surface, which refers to the reference structure of this section.

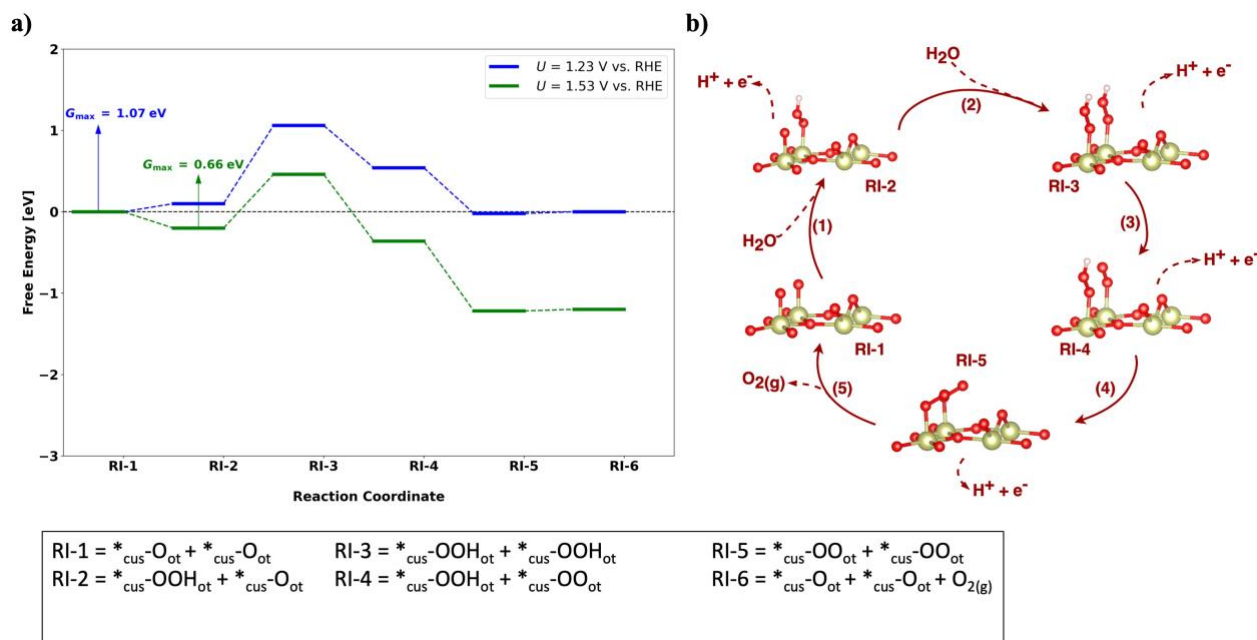

**Figure S16. a)** Free-energy diagram for the oxide mechanism on the fully oxygen-covered IrO<sub>2</sub>(110) surface at 1.23 V and 1.53 V vs. RHE. The reaction intermediates of the mechanistic cycle are labeled on the x-axis. Blue and green solid lines indicate intermediates' free energies at 1.23 V and 1.53 V, respectively. Colored arrows indicate the free-energy span governing  $G_{\max}(U)$ , with the respective value displayed.

**b)** Schematic illustration of the oxide mechanism, as described in Section 3.4, on the fully oxygen-covered IrO<sub>2</sub>(110) surface. Numbers next to the arrows indicate the step sequence, and each structure represents the corresponding reaction intermediate.



**Table S16.** Energetic evaluation of the oxide mechanism on the fully oxygen-covered IrO<sub>2</sub>(110) surface (cf. **Figure 1d** in the main text) by the framework of the descriptor  $G_{\max}(U)$ . The table indicates the free-energy changes of each step at  $U = 0$  V vs. RHE and  $G_{\max}(U)$  values at different applied electrode potentials ( $U$ ).

| $\Delta G_1$<br>[eV] | $\Delta G_2$<br>[eV] | $\Delta G_3$<br>[eV] | $\Delta G_4$<br>[eV] | $\Delta G_5$<br>[eV] | $G_{\max}(U)$<br>[eV] |        |        |        |        |
|----------------------|----------------------|----------------------|----------------------|----------------------|-----------------------|--------|--------|--------|--------|
|                      |                      |                      |                      |                      | 1.23 V                | 1.33 V | 1.43 V | 1.53 V | 1.63 V |
| 1.33                 | 2.19                 | 0.71                 | 0.67                 | 0.01                 | 1.07                  | 0.87   | 0.76   | 0.66   | 0.56   |

## 6.5 Binuclear mechanism

**Table S17** compiles the free-energy changes for each elementary step at  $U = 0$  V vs. RHE and the activity descriptor  $G_{\max}(U)$  at different applied electrode potentials under OER conditions. The corresponding free-energy diagram is depicted in **Figure S17a**. In the potential range of 1.23 V to 1.53 V vs. RHE, the descriptor  $G_{\max}(U)$  is governed by the free-energy span of the \*OH intermediate to the product O<sub>2</sub>.

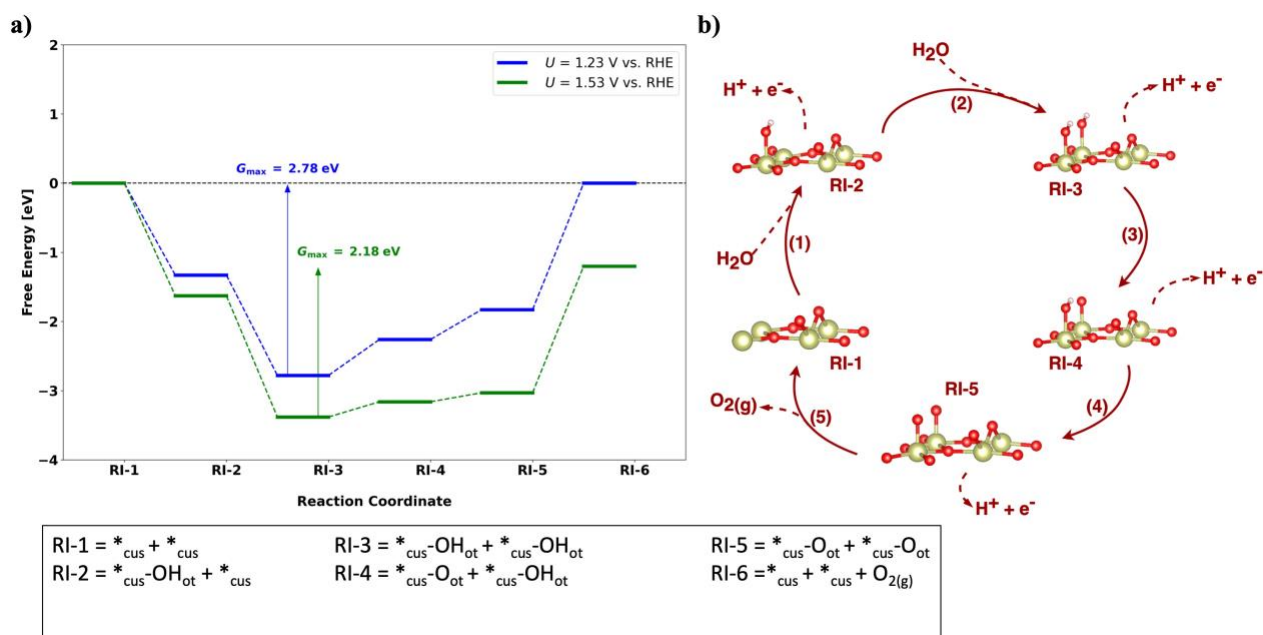

**Figure S17. a)** Free-energy diagram for the binuclear mechanism on the fully oxygen-covered IrO<sub>2</sub>(110) surface at 1.23 V and 1.53 V vs. RHE. The reaction intermediates of the mechanistic cycle are labeled on the x-axis. Blue and green solid lines indicate intermediates' free energies at 1.23 V and 1.53 V, respectively. Colored arrows indicate the free-energy span governing  $G_{\max}(U)$ , with the respective value displayed.

**b)** Schematic illustration of the binuclear mechanism, as described in Section 3.5, on the fully oxygen-covered IrO<sub>2</sub>(110) surface. Numbers next to the arrows indicate the step sequence, and each structure represents the corresponding reaction intermediate.

**Table S17.** Energetic evaluation of the binuclear mechanism on the fully oxygen-covered IrO<sub>2</sub>(110) surface (cf. **Figure 1d** in the main text) by the framework of the descriptor  $G_{\max}(U)$ . The table indicates the free-energy changes of each step at  $U = 0$  V vs. RHE and  $G_{\max}(U)$  values at different applied electrode potentials ( $U$ ).

| $\Delta G_1$<br>[eV] | $\Delta G_2$<br>[eV] | $\Delta G_3$<br>[eV] | $\Delta G_4$<br>[eV] | $\Delta G_5$<br>[eV] | $G_{\max}(U)$<br>[eV] |        |        |        |        |
|----------------------|----------------------|----------------------|----------------------|----------------------|-----------------------|--------|--------|--------|--------|
|                      |                      |                      |                      |                      | 1.23 V                | 1.33 V | 1.43 V | 1.53 V | 1.63 V |
| -0.10                | -0.22                | 1.75                 | 1.66                 | 1.83                 | 2.78                  | 2.58   | 2.38   | 2.18   | 1.98   |

## 6.6 Assessment of solvation effects by VASPsol

**Table S18** compiles the calculated free-energy changes neglecting or including solvation, their differences, and the difference in the activity descriptor  $G_{\max}(U)$ . While the quantitative impact of solvation on the free-energy changes does not exceed 0.25 eV, the value of the activity descriptor  $G_{\max}(U)$  is unchanged for large overpotentials ( $U > 1.53$  V vs. RHE).

**Table S18.** Comparing the energetics of gas-phase DFT calculations and DFT including implicit solvation by means of VASPsol for the elementary steps of the mononuclear OER mechanism on the fully oxygen-covered IrO<sub>2</sub>(110) surface. Note that  $\Delta\Delta G_j$  ( $j = 1, 2, 3, 4$ ) indicates the free-energy difference of the free-energy changes for the continuum solvation approach and gas-phase DFT. Likewise,  $\Delta G_{\max}(U)$  denotes the difference in the activity descriptor  $G_{\max}(U)$  for the continuum solvation approach and gas-phase DFT.

|                                                                                      |                    |                    |                    | $\Delta G_1$<br>[eV]                                                                                         | $\Delta G_2$<br>[eV] | $\Delta G_3$<br>[eV] | $\Delta G_4$<br>[eV] |        |
|--------------------------------------------------------------------------------------|--------------------|--------------------|--------------------|--------------------------------------------------------------------------------------------------------------|----------------------|----------------------|----------------------|--------|
| Gas-phase DFT                                                                        |                    |                    |                    | 0.03                                                                                                         | 1.66                 | 1.29                 | 1.93                 |        |
| DFT + VASPsol                                                                        |                    |                    |                    | -0.09                                                                                                        | 1.57                 | 1.54                 | 1.90                 |        |
| $\Delta\Delta G_j = \Delta G_{j; \text{VASPsol}} - \Delta G_{j; \text{gas}}$<br>[eV] |                    |                    |                    | $\Delta G_{\text{max}}(U) = (G_{\text{max}}(U))_{\text{VASPsol}} - (G_{\text{max}}(U))_{\text{gas}}$<br>[eV] |                      |                      |                      |        |
| $\Delta\Delta G_1$                                                                   | $\Delta\Delta G_2$ | $\Delta\Delta G_3$ | $\Delta\Delta G_4$ | 1.23 V                                                                                                       | 1.33 V               | 1.43 V               | 1.53 V               | 1.63 V |
| -0.12                                                                                | -0.09              | 0.25               | -0.03              | 0.12                                                                                                         | 0.12                 | 0.12                 | 0.01                 | -0.04  |

## 6.7 Assessment of constant potential DFT

Catalytic processes at electrified solid/ liquid interfaces take place at constant potential (grand canonical ensemble) rather than at constant charge (canonical ensemble) conditions, though the latter refers to the application of the CHE approach. To qualitatively assess the impact of the different ensembles on activity predictions, we adopt the mononuclear description on the fully oxygen-covered IrO<sub>2</sub>(110) surface and compare the constant potential and constant charge descriptions at  $U = 1.43$  V vs. RHE. Note that the application of the grand canonical approach

also contains the inclusion of implicit solvation by VASPsol package whereas the canonical description relies on gas-phase DFT. **Table S19** compiles the calculated free-energy changes in the canonical and grand canonical ensembles at  $U = 1.43$  V vs. RHE as well as the activity descriptor  $G_{\max}(U = 1.43$  V). Given that the difference in  $G_{\max}(U = 1.43$  V) is only 0.02 eV, we conclude that it is sufficient to apply the constant charge formalism in the realm of the CHE approach to study the elementary steps of the OER over IrO<sub>2</sub>(110).

**Table S19.** Comparing the energetics of gas-phase DFT calculations and grand canonical DFT (GC-DFT) including implicit solvation by means of VASPsol for the elementary steps of the mononuclear OER mechanism over the fully oxygen-covered IrO<sub>2</sub>(110) surface at  $U = 1.43$  V vs. RHE.

|                      | $\Delta G_1$<br>[eV]           | $\Delta G_2$<br>[eV] | $\Delta G_3$<br>[eV] | $\Delta G_4$<br>[eV] | $G_{\max}(U)$<br>[eV] |
|----------------------|--------------------------------|----------------------|----------------------|----------------------|-----------------------|
|                      | <b><math>U = 1.43</math> V</b> |                      |                      |                      |                       |
| <b>Gas-phase DFT</b> | -1.40                          | 0.23                 | -0.14                | 0.50                 | 0.60                  |
| <b>GC-DFT</b>        | -1.06                          | 0.33                 | -0.69                | 0.62                 | 0.62                  |

## 7 OER over the partly OOH-covered IrO<sub>2</sub>(110) surface

### 7.1 Mononuclear mechanism

**Table S20** compiles the free-energy changes for each elementary step at  $U = 0$  V vs. RHE and the activity descriptor  $G_{\max}(U)$  at different applied electrode potentials under OER conditions. The corresponding free-energy diagram is depicted in **Figure S18a**, with a visual representation of the elementary steps in **Figure S18b**. The activity descriptor  $G_{\max}(U)$  is governed by the span  $^*\text{cus-OH}_{\text{ot}} \rightarrow ^*\text{cus-O}_{\text{ot}} \rightarrow ^*\text{cus-OOH}_{\text{ot}}$  in the potential range of  $U = 1.23$  V to 1.53 V vs. RHE.

**Table S20.** Energetic evaluation of the mononuclear mechanism on the partly OOH-covered IrO<sub>2</sub>(110) surface (cf. **Figure 1e** in the main text) by the framework of the descriptor  $G_{\max}(U)$ . The table indicates the free-energy changes of each step at  $U = 0$  V vs. RHE and  $G_{\max}(U)$  values at different applied electrode potentials ( $U$ ).

| $\Delta G_1$<br>[eV] | $\Delta G_2$<br>[eV] | $\Delta G_3$<br>[eV] | $\Delta G_4$<br>[eV] | $G_{\max}(U)$<br>[eV] |        |        |        |        |
|----------------------|----------------------|----------------------|----------------------|-----------------------|--------|--------|--------|--------|
|                      |                      |                      |                      | 1.23 V                | 1.33 V | 1.43 V | 1.53 V | 1.63 V |
| -0.23                | 1.88                 | 2.19                 | 1.07                 | 1.61                  | 1.41   | 1.21   | 1.01   | 0.81   |

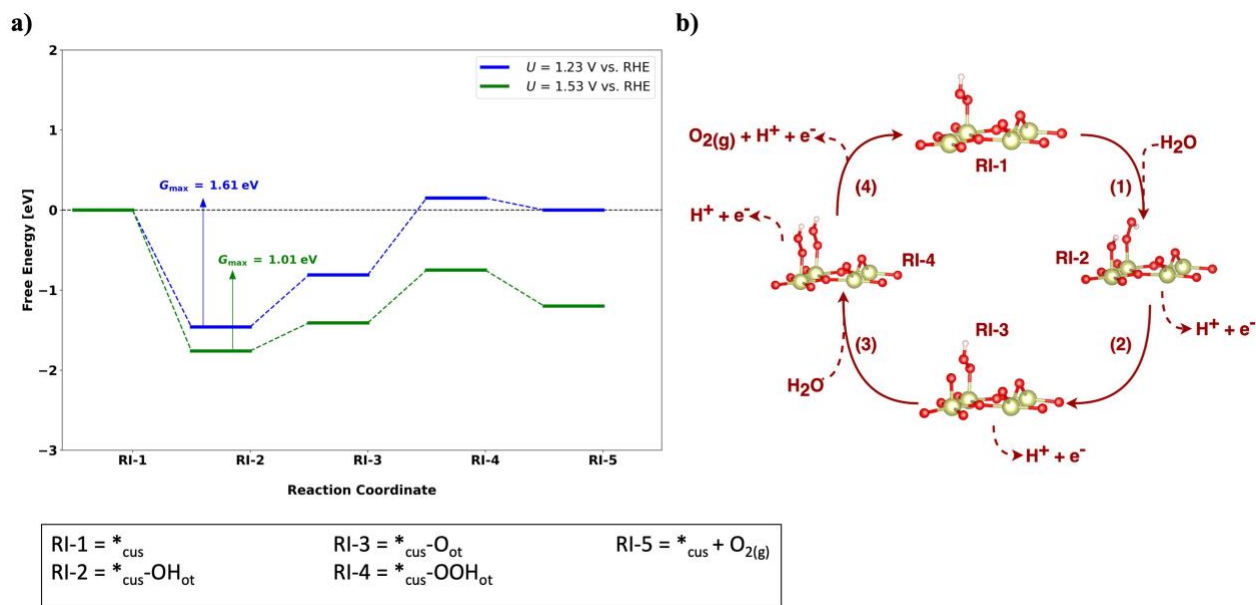

**Figure S18. a)** Free-energy diagram for the mononuclear mechanism on the partly OOH-covered  $\text{IrO}_2(110)$  surface at 1.23 V and 1.53 V vs. RHE. The reaction intermediates of the mechanistic cycle are labeled on the x-axis. Blue and green solid lines indicate intermediates' free energies at 1.23 V and 1.53 V, respectively. Colored arrows indicate the free-energy span governing  $G_{\text{max}}(U)$ , with the respective value displayed.

**b)** Schematic illustration of the mononuclear mechanism, as described in Section 3.1, on the partly OOH-covered  $\text{IrO}_2(110)$  surface. Numbers next to the arrows indicate the step sequence, and each structure represents the corresponding reaction intermediate.

## 7.2 Bifunctional I mechanism

**Table S21** compiles the free-energy changes for each elementary step at  $U = 0$  V vs. RHE and the activity descriptor  $G_{\text{max}}(U)$  at different applied electrode potentials under OER conditions. The corresponding free-energy diagram is depicted in **Figure S19a**. Similar to the mononuclear mechanism, the activity descriptor  $G_{\text{max}}(U)$  is governed by the span  $^*_{\text{cus}}\text{-OH}_{\text{ot}} + \text{O}_{\text{br}} \rightarrow ^*_{\text{cus}}\text{-O}_{\text{ot}} + \text{O}_{\text{br}} \rightarrow ^*_{\text{cus}}\text{-OO}_{\text{ot}} + \text{OH}_{\text{br}} \rightarrow ^*_{\text{cus}} + \text{O}_{\text{br}} + \text{O}_2$  in the potential range of  $U = 1.23$  V to 1.53 V vs. RHE.

**Table S21.** Energetic evaluation of the bifunctional I mechanism on the partly OOH-covered  $\text{IrO}_2(110)$  surface (cf. **Figure 1e** in the main text) by the framework of the descriptor  $G_{\text{max}}(U)$ . The table indicates the free-energy changes of each step at  $U = 0$  V vs. RHE and  $G_{\text{max}}(U)$  values at different applied electrode potentials ( $U$ ).

| $\Delta G_1$<br>[eV] | $\Delta G_2$<br>[eV] | $\Delta G_3$<br>[eV] | $\Delta G_4$<br>[eV] | $G_{\text{max}}(U)$<br>[eV] |        |        |        |        |
|----------------------|----------------------|----------------------|----------------------|-----------------------------|--------|--------|--------|--------|
|                      |                      |                      |                      | 1.23 V                      | 1.33 V | 1.43 V | 1.53 V | 1.63 V |
| -0.23                | 1.88                 | 1.35                 | 1.91                 | 1.46                        | 1.16   | 0.86   | 0.56   | 0.28   |

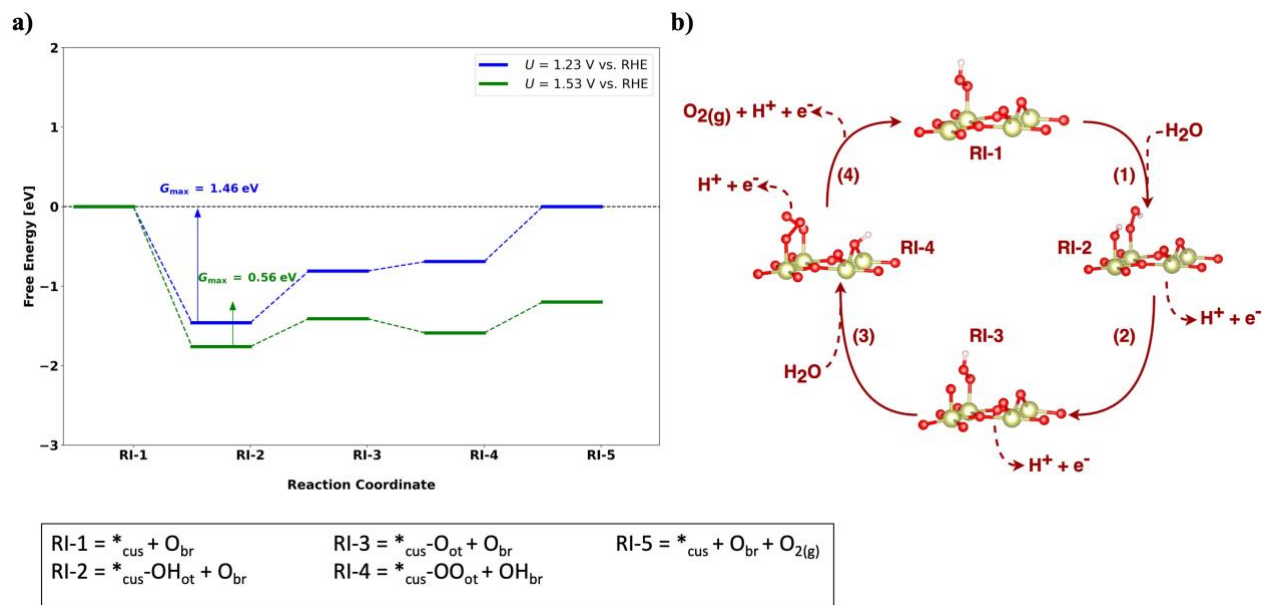

**Figure S19. a)** Free-energy diagram for the bifunctional I mechanism on the partly OOH-covered IrO<sub>2</sub>(110) surface at 1.23 V and 1.53 V vs. RHE. The reaction intermediates of the mechanistic cycle are labeled on the x-axis. Blue and green solid lines indicate intermediates' free energies at 1.23 V and 1.53 V, respectively. Colored arrows indicate the free-energy span governing  $G_{\text{max}}(U)$ , with the respective value displayed.

**b)** Schematic illustration of the bifunctional I mechanism, as described in Section 3.2, on the partly OOH-covered IrO<sub>2</sub>(110) surface. Numbers next to the arrows indicate the step sequence, and each structure represents the corresponding reaction intermediate.

### 7.3 Bifunctional II mechanism

**Table S22** compiles the free-energy changes for each elementary step at  $U = 0$  V vs. RHE and the activity descriptor  $G_{\text{max}}(U)$  at different applied electrode potentials under OER conditions. The corresponding free-energy diagram is depicted in **Figure S20a**. The activity descriptor  $G_{\text{max}}(U)$  is governed by the span  $*_{\text{cus}}\text{-OH}_{\text{ot}} + \text{O}_{\text{br}} \rightarrow *_{\text{cus}}\text{-O}_{\text{ot}} + \text{O}_{\text{br}} \rightarrow *_{\text{cus}}\text{-OOH}_{\text{ot}} + \text{OH}_{\text{br}} \rightarrow *_{\text{cus}}\text{-OOH}_{\text{ot}} + \text{O}_{\text{br}}$  in the potential range of  $U = 1.23$  V to 1.53 V vs. RHE.

**Table S22.** Energetic evaluation of the bifunctional II mechanism on the partly OOH-covered IrO<sub>2</sub>(110) surface (cf. **Figure 1e** in the main text) by the framework of the descriptor  $G_{\text{max}}(U)$ . The table indicates the free-energy changes of each step at  $U = 0$  V vs. RHE and  $G_{\text{max}}(U)$  values at different applied electrode potentials ( $U$ ).

| $\Delta G_1$<br>[eV] | $\Delta G_2$<br>[eV] | $\Delta G_3$<br>[eV] | $\Delta G_4$<br>[eV] | $\Delta G_5$<br>[eV] | $G_{\text{max}}(U)$<br>[eV] |        |        |        |        |
|----------------------|----------------------|----------------------|----------------------|----------------------|-----------------------------|--------|--------|--------|--------|
|                      |                      |                      |                      |                      | 1.23 V                      | 1.33 V | 1.43 V | 1.53 V | 1.63 V |
| -0.23                | 1.88                 | 0.33                 | 1.86                 | 1.07                 | 1.61                        | 1.41   | 1.21   | 1.01   | 0.81   |

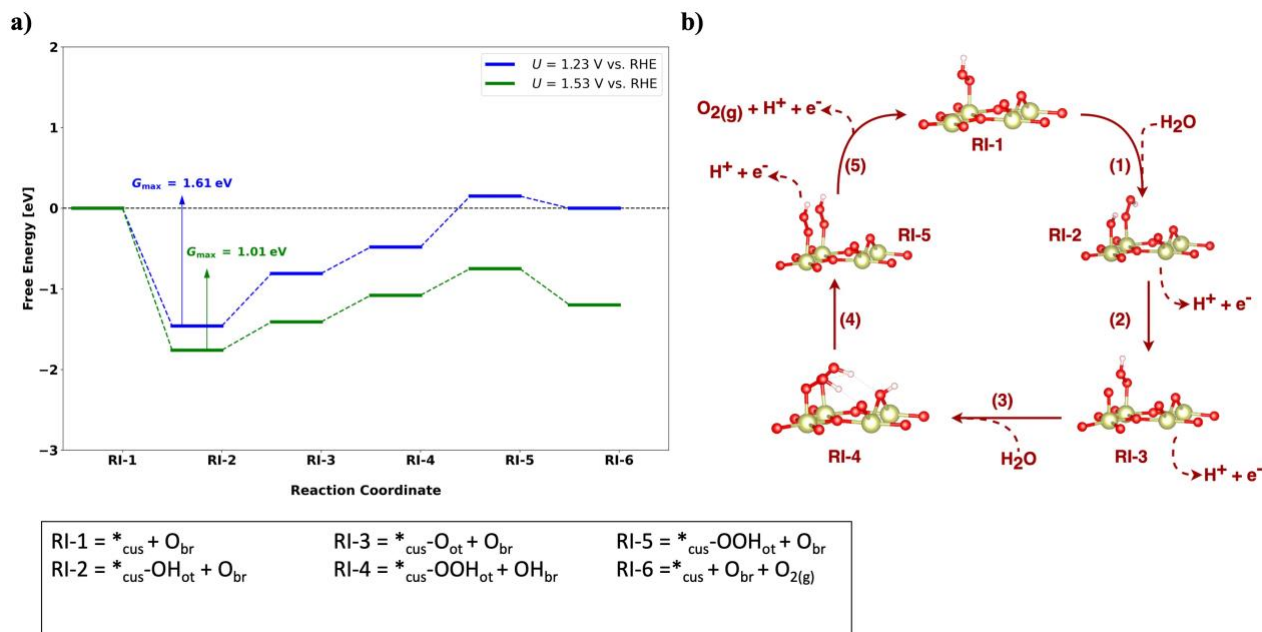

**Figure S20. a)** Free-energy diagram for the bifunctional II mechanism on the partly OOH-covered  $\text{IrO}_2(110)$  surface at 1.23 V and 1.53 V vs. RHE. The reaction intermediates of the mechanistic cycle are labeled on the x-axis. Blue and green solid lines indicate intermediates' free energies at 1.23 V and 1.53 V, respectively. Colored arrows indicate the free-energy span governing  $G_{\text{max}}(U)$ , with the respective value displayed.

**b)** Schematic illustration of the bifunctional II mechanism, as described in Section 3.3, on the partly OOH-covered  $\text{IrO}_2(110)$  surface. Numbers next to the arrows indicate the step sequence, and each structure represents the corresponding reaction intermediate.

## 7.4 Oxide mechanism

**Table S23** compiles the free-energy changes for each elementary step at  $U = 0$  V vs. RHE and the activity descriptor  $G_{\text{max}}(U)$  at different applied electrode potentials under OER conditions. The corresponding free-energy diagram is depicted in **Figure S21a**. In contrast to the other mechanisms, the activity descriptor  $G_{\text{max}}(U)$  is governed by the formation rather than the decomposition of the  $^*\text{OOH}$  intermediate from the  $^*\text{O}$ -covered surface. We note that the obtained results are identical to the partly hydroxylated and fully oxygen-covered surfaces in sections 5.4 and 6.4, respectively.

**Table S23.** Energetic evaluation of the oxide mechanism on the partly OOH-covered  $\text{IrO}_2(110)$  surface (cf. **Figure 1e** in the main text) by the framework of the descriptor  $G_{\text{max}}(U)$ . The table indicates the free-energy changes of each step at  $U = 0$  V vs. RHE and  $G_{\text{max}}(U)$  values at different applied electrode potentials ( $U$ ).

| $\Delta G_1$<br>[eV] | $\Delta G_2$<br>[eV] | $\Delta G_3$<br>[eV] | $\Delta G_4$<br>[eV] | $\Delta G_5$<br>[eV] | $G_{\text{max}}(U)$<br>[eV] |        |        |        |        |
|----------------------|----------------------|----------------------|----------------------|----------------------|-----------------------------|--------|--------|--------|--------|
|                      |                      |                      |                      |                      | 1.23 V                      | 1.33 V | 1.43 V | 1.53 V | 1.63 V |
| 1.33                 | 2.19                 | 0.71                 | 0.67                 | 0.01                 | 1.07                        | 0.87   | 0.76   | 0.66   | 0.56   |

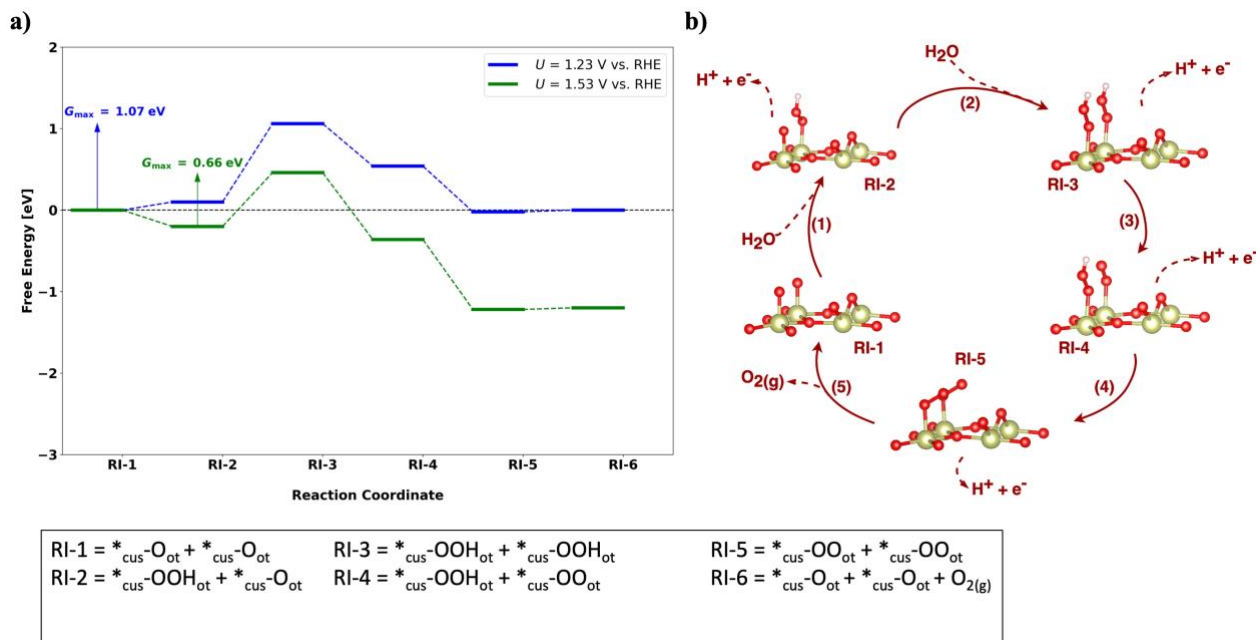

**Figure S21. a)** Free-energy diagram for the oxide mechanism on the partly OOH-covered  $\text{IrO}_2(110)$  surface at 1.23 V and 1.53 V vs. RHE. The reaction intermediates of the mechanistic cycle are labeled on the x-axis. Blue and green solid lines indicate intermediates' free energies at 1.23 V and 1.53 V, respectively. Colored arrows indicate the free-energy span governing  $G_{\text{max}}(U)$ , with the respective value displayed.

**b)** Schematic illustration of the oxide mechanism, as described in Section 3.4, on the partly OOH-covered  $\text{IrO}_2(110)$  surface. Numbers next to the arrows indicate the step sequence, and each structure represents the corresponding reaction intermediate.

## 7.5 Binuclear mechanism

The binuclear mechanism consists of the chemical recombination of two adjacent  $^*\text{O}$  adsorbates. Due to the presence of the  $^*_{\text{cus}}\text{-OOH}_{\text{ot}}$  intermediate on the neighboring cus site, we conclude that the binuclear mechanism cannot proceed on the partly OOH-covered surface due to the lack of surface oxygen,  $^*_{\text{cus}}\text{-O}_{\text{ot}}$ , on the cus sites.

## 7.6 Assessment of solvation effects by VASPsol

**Table S24** compiles the calculated free-energy changes neglecting or including solvation, their differences, and the difference in the activity descriptor  $G_{\text{max}}(U)$ . While the quantitative impact of solvation on the free-energy changes is less than 0.20 eV, we observe that there is a constant difference of 0.15 eV for the values of the activity descriptor  $G_{\text{max}}(U)$  for the two different approaches.

**Table S24.** Comparing the energetics of gas-phase DFT calculations and DFT including implicit solvation by means of VASPsol for the elementary steps of the mononuclear OER mechanism on the partly OOH-covered IrO<sub>2</sub>(110) surface. Note that  $\Delta\Delta G_j$  ( $j = 1, 2, 3, 4$ ) indicates the free-energy difference of the free-energy changes for the continuum solvation approach and gas-phase DFT. Likewise,  $\Delta G_{\max}(U)$  denotes the difference in the activity descriptor  $G_{\max}(U)$  for the continuum solvation approach and gas-phase DFT.

|                                                                                      |                    |                    |                    | $\Delta G_1$<br>[eV]                                                                                         | $\Delta G_2$<br>[eV] | $\Delta G_3$<br>[eV] | $\Delta G_4$<br>[eV] |        |
|--------------------------------------------------------------------------------------|--------------------|--------------------|--------------------|--------------------------------------------------------------------------------------------------------------|----------------------|----------------------|----------------------|--------|
| Gas-phase DFT                                                                        |                    |                    |                    | -0.23                                                                                                        | 1.88                 | 2.19                 | 1.07                 |        |
| DFT + VASPsol                                                                        |                    |                    |                    | -0.23                                                                                                        | 1.71                 | 2.22                 | 1.22                 |        |
| $\Delta\Delta G_j = \Delta G_{j; \text{VASPsol}} - \Delta G_{j; \text{gas}}$<br>[eV] |                    |                    |                    | $\Delta G_{\text{max}}(U) = (G_{\text{max}}(U))_{\text{VASPsol}} - (G_{\text{max}}(U))_{\text{gas}}$<br>[eV] |                      |                      |                      |        |
| $\Delta\Delta G_1$                                                                   | $\Delta\Delta G_2$ | $\Delta\Delta G_3$ | $\Delta\Delta G_4$ | 1.23 V                                                                                                       | 1.33 V               | 1.43 V               | 1.53 V               | 1.63 V |
| 0                                                                                    | -0.17              | 0.03               | 0.15               | -0.15                                                                                                        | -0.15                | -0.15                | -0.15                | -0.15  |

## 8 Elementary steps of Walden pathways

All the reaction mechanisms discussed so far rely on the notion that the unoccupied metal site,  $*_{\text{cus}}$ , is formed after product formation. However, it is also possible that product desorption and reactant adsorption proceed simultaneously, giving rise to so-called Walden pathways.<sup>34</sup> In these mechanisms, the metal site is always occupied with an adsorbate and does not become vacant in the course of the catalysis.

The term Walden inversion is coined from the field of organic chemistry where it refers to the concurrent removal of a leaving group and adsorption of the reactant with an inversion of the stereochemistry.<sup>35</sup> Interestingly, this scenario can also be transferred to surface reactions in heterogeneous catalysis, as recently highlighted by two different groups.<sup>34,36</sup>

In the following, we provide reaction equations for the elementary steps of the mononuclear-Walden and bifunctional-Walden mechanisms. Please note that we did not consider the oxide-Walden and binuclear-Walden pathways in our study due to the following reason: the oxide- and binuclear-Walden mechanisms require two adjacent active sites to form the product O<sub>2</sub> by a chemical recombination of two neighboring oxygen species. To account for the notion of the Walden inversion in that the metal site is always capped by an adsorbate, it would require the concurrent adsorption of two water molecules on the adjacent active sites during the desorption of the product O<sub>2</sub>. We conclude that such a scenario is unlikely due to steric reasons, considering that about 50 % of the surrounding of the active  $*_{\text{cus}}$  site is unavailable due to the bulk structure underneath. To this end, we purport that only for a single-site mechanism with one main active site such as the mononuclear and bifunctional descriptions, a Walden inversion mechanism can take place for heterogeneous electrocatalysts.



## 8.1 Mononuclear-Walden mechanism

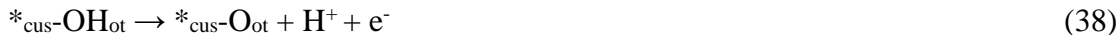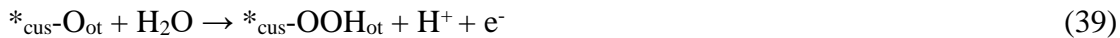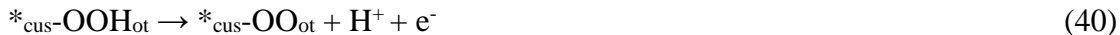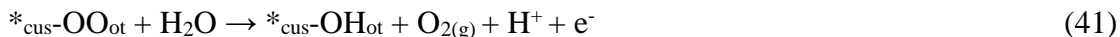

## 8.2 Bifunctional-Walden mechanism

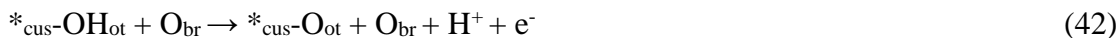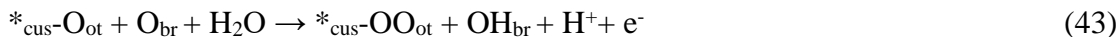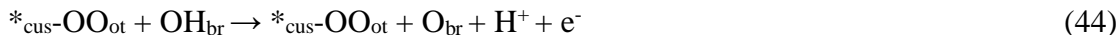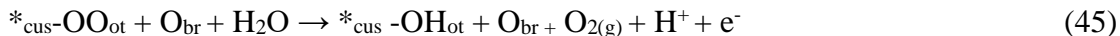

## 9 Walden pathways over the fully hydroxylated IrO<sub>2</sub>(110) surface

### 9.1 Mononuclear-Walden mechanism

The mononuclear-Walden consists of the sequential formation of the \*O (step 1), \*OOH (step 2), and \*OO (step 3) adsorbates, followed by the simultaneous release of O<sub>2</sub> and formation of the \*OH adsorbate in the final step (step 4). **Table S25** compiles the free-energy changes for each elementary step at  $U = 0$  V vs. RHE and the activity descriptor  $G_{\text{max}}(U)$  at different applied electrode potentials under OER conditions. The corresponding free-energy diagram is depicted in **Figure S22a**, with a visual representation of the elementary steps in **Figure S22b**. While the activity descriptor  $G_{\text{max}}(U)$  is governed by the span  $*_{\text{cus}}\text{-OH}_{\text{ot}} \rightarrow *_{\text{cus}}\text{-O}_{\text{ot}} \rightarrow *_{\text{cus}}\text{-OOH}_{\text{ot}}$  for  $U = 1.23$  V vs. RHE, the limiting span switches to  $*_{\text{cus}}\text{-OH}_{\text{ot}} \rightarrow *_{\text{cus}}\text{-O}_{\text{ot}}$  at larger applied overpotentials (1.53 V vs. RHE).

**Table S25.** Energetic evaluation of the mononuclear-Walden mechanism on the fully hydroxylated IrO<sub>2</sub>(110) surface (cf. **Figure 1b** in the main text) by the framework of the descriptor  $G_{\text{max}}(U)$ . The table indicates the free-energy changes of each step at  $U = 0$  V vs. RHE and  $G_{\text{max}}(U)$  values at different applied electrode potentials ( $U$ ).

| $\Delta G_1$<br>[eV] | $\Delta G_2$<br>[eV] | $\Delta G_3$<br>[eV] | $\Delta G_4$<br>[eV] | $G_{\text{max}}(U)$<br>[eV] |        |        |        |        |
|----------------------|----------------------|----------------------|----------------------|-----------------------------|--------|--------|--------|--------|
|                      |                      |                      |                      | 1.23 V                      | 1.33 V | 1.43 V | 1.53 V | 1.63 V |
| 1.65                 | 1.44                 | 1.02                 | 0.81                 | 0.63                        | 0.43   | 0.23   | 0.12   | 0.02   |

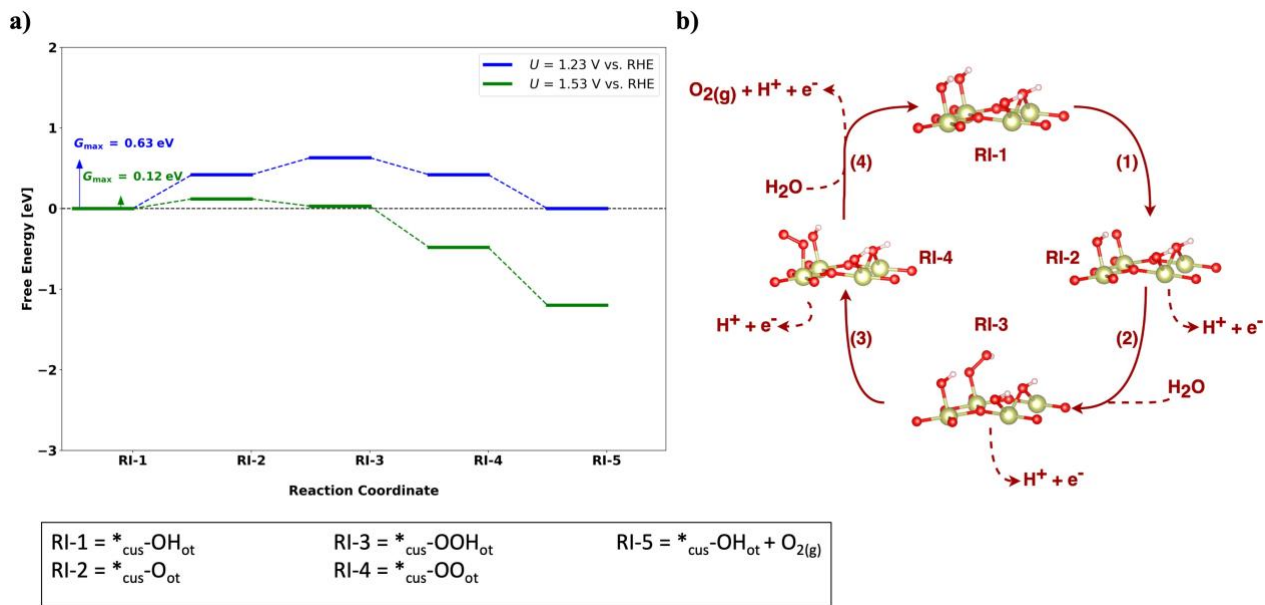

**Figure S22. a)** Free-energy diagram for the mononuclear-Walden mechanism on the fully hydroxylated  $\text{IrO}_2(110)$  surface at 1.23 V and 1.53 V vs. RHE. The reaction intermediates of the mechanistic cycle are labeled on the x-axis. Blue and green solid lines indicate intermediates' free energies at 1.23 V and 1.53 V, respectively. Colored arrows indicate the free-energy span governing  $G_{\text{max}}(U)$ , with the respective value displayed.

**b)** Schematic illustration of the mononuclear-Walden mechanism, as described in Section 8.1, on the fully hydroxylated  $\text{IrO}_2(110)$  surface. Numbers next to the arrows indicate the step sequence, and each structure represents the corresponding reaction intermediate.

## 9.2 Bifunctional-Walden mechanism

The bifunctional-Walden differs from the mononuclear-Walden mechanism in that the formation of the  $^*\text{OOH}$  intermediate is circumvented (cf. section 8.2). **Table S26** compiles the free-energy changes for each elementary step at  $U = 0$  V vs. RHE and the activity descriptor  $G_{\text{max}}(U)$  at different applied electrode potentials under OER conditions. The corresponding free-energy diagram is depicted in **Figure S23a**, with a visual representation of the elementary steps in **Figure S23b**. While the activity descriptor  $G_{\text{max}}(U)$  is governed by the span  $^*\text{cus-OH}_{\text{ot}} + \text{O}_{\text{br}} \rightarrow ^*\text{cus-O}_{\text{ot}} + \text{O}_{\text{br}} \rightarrow ^*\text{cus-OO}_{\text{ot}} + \text{OH}_{\text{br}}$  for  $U = 1.23$  V vs. RHE, the limiting span switches to  $^*\text{cus-OH}_{\text{ot}} + \text{O}_{\text{br}} \rightarrow ^*\text{cus-O}_{\text{ot}} + \text{O}_{\text{br}}$  at larger applied overpotentials (1.53 V vs. RHE).

**Table S26.** Energetic evaluation of the bifunctional-Walden mechanism on the fully hydroxylated  $\text{IrO}_2(110)$  surface (cf. **Figure 1b** in the main text) by the framework of the descriptor  $G_{\text{max}}(U)$ . The table indicates the free-energy changes of each step at  $U = 0$  V vs. RHE and  $G_{\text{max}}(U)$  values at different applied electrode potentials ( $U$ ).

| $\Delta G_1$<br>[eV] | $\Delta G_2$<br>[eV] | $\Delta G_3$<br>[eV] | $\Delta G_4$<br>[eV] | $G_{\text{max}}(U)$<br>[eV] |        |        |        |        |
|----------------------|----------------------|----------------------|----------------------|-----------------------------|--------|--------|--------|--------|
|                      |                      |                      |                      | 1.23 V                      | 1.33 V | 1.43 V | 1.53 V | 1.63 V |
| 1.66                 | 1.42                 | 1.08                 | 0.77                 | 0.62                        | 0.42   | 0.23   | 0.13   | 0.03   |

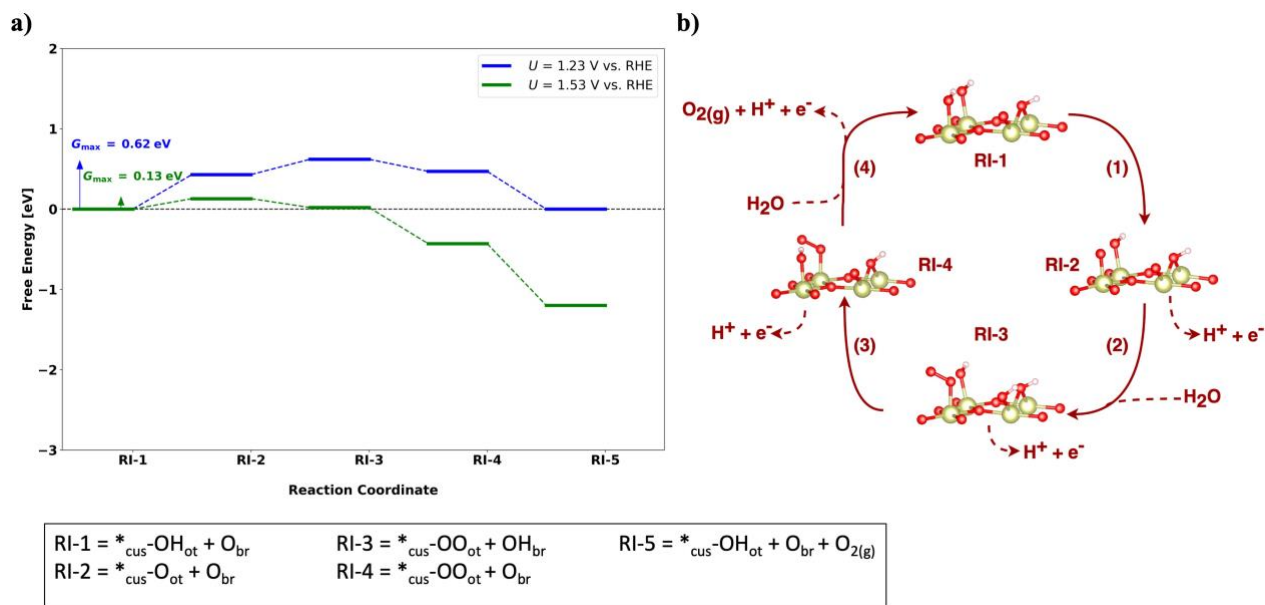

**Figure S23. a)** Free-energy diagram for the bifunctional-Walden mechanism on the fully hydroxylated  $\text{IrO}_2(110)$  surface at 1.23 V and 1.53 V vs. RHE. The reaction intermediates of the mechanistic cycle are labeled on the x-axis. Blue and green solid lines indicate intermediates' free energies at 1.23 V and 1.53 V, respectively. Colored arrows indicate the free-energy span governing  $G_{\text{max}}(U)$ , with the respective value displayed.

**b)** Schematic illustration of the bifunctional-Walden mechanism, as described in Section 8.2, on the fully hydroxylated  $\text{IrO}_2(110)$  surface. Numbers next to the arrows indicate the step sequence, and each structure represents the corresponding reaction intermediate.

## 10 Walden pathways over the partly hydroxylated $\text{IrO}_2(110)$ surface

### 10.1 Mononuclear-Walden mechanism

**Table S27** compiles the free-energy changes for each elementary step at  $U = 0$  V vs. RHE and the activity descriptor  $G_{\text{max}}(U)$  at different applied electrode potentials under OER conditions. The corresponding free-energy diagram is depicted in **Figure S24a**, with a visual representation of the elementary steps in **Figure S24b**. The activity descriptor  $G_{\text{max}}(U)$  is governed by the span  ${}^*\text{cus-OH}_{\text{ot}} \rightarrow {}^*\text{cus-O}_{\text{ot}}$  in the potential range of  $U = 1.23$  V to 1.53 V vs. RHE.

**Table S27.** Energetic evaluation of the mononuclear-Walden mechanism on the partly hydroxylated  $\text{IrO}_2(110)$  surface (cf. **Figure 1c** in the main text) by the framework of the descriptor  $G_{\text{max}}(U)$ . The table indicates the free-energy changes of each step at  $U = 0$  V vs. RHE and  $G_{\text{max}}(U)$  values at different applied electrode potentials ( $U$ ).

| $\Delta G_1$<br>[eV] | $\Delta G_2$<br>[eV] | $\Delta G_3$<br>[eV] | $\Delta G_4$<br>[eV] | $G_{\text{max}}(U)$<br>[eV] |        |        |        |        |
|----------------------|----------------------|----------------------|----------------------|-----------------------------|--------|--------|--------|--------|
|                      |                      |                      |                      | 1.23 V                      | 1.33 V | 1.43 V | 1.53 V | 1.63 V |
| 1.75                 | 1.12                 | 1.22                 | 0.83                 | 0.52                        | 0.42   | 0.32   | 0.22   | 0.12   |

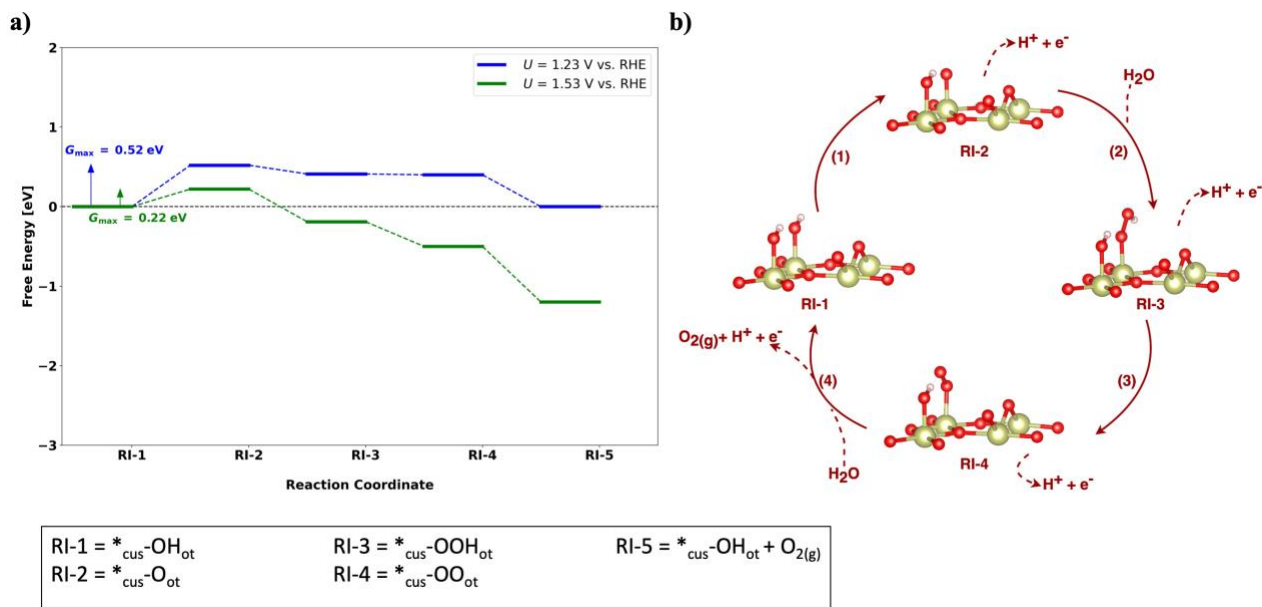

**Figure S24. a)** Free-energy diagram for the mononuclear-Walden mechanism on the partly hydroxylated  $\text{IrO}_2(110)$  surface at 1.23 V and 1.53 V vs. RHE. The reaction intermediates of the mechanistic cycle are labeled on the x-axis. Blue and green solid lines indicate intermediates' free energies at 1.23 V and 1.53 V, respectively. Colored arrows indicate the free-energy span governing  $G_{\text{max}}(U)$ , with the respective value displayed.

**b)** Schematic illustration of the mononuclear-Walden mechanism, as described in Section 8.1, on the partly hydroxylated  $\text{IrO}_2(110)$  surface. Numbers next to the arrows indicate the step sequence, and each structure represents the corresponding reaction intermediate.

## 10.2 Bifunctional-Walden mechanism

**Table S28** compiles the free-energy changes for each elementary step at  $U = 0$  V vs. RHE and the activity descriptor  $G_{\text{max}}(U)$  at different applied electrode potentials under OER conditions. The corresponding free-energy diagram is depicted in **Figure S25a**, with a visual representation of the elementary steps in **Figure S25b**. The activity descriptor  $G_{\text{max}}(U)$  is governed by the span  $^{*}_{\text{cus}}\text{-OH}_{\text{ot}} + \text{O}_{\text{br}} \rightarrow ^{*}_{\text{cus}}\text{-O}_{\text{ot}} + \text{O}_{\text{br}}$  in the potential range of  $U = 1.23$  V to 1.53 V vs. RHE.

**Table S28.** Energetic evaluation of the bifunctional-Walden mechanism on the partly hydroxylated  $\text{IrO}_2(110)$  surface (cf. **Figure 1c** in the main text) by the framework of the descriptor  $G_{\text{max}}(U)$ . The table indicates the free-energy changes of each step at  $U = 0$  V vs. RHE and  $G_{\text{max}}(U)$  values at different applied electrode potentials ( $U$ ).

| $\Delta G_1$<br>[eV] | $\Delta G_2$<br>[eV] | $\Delta G_3$<br>[eV] | $\Delta G_4$<br>[eV] | $G_{\text{max}}(U)$<br>[eV] |        |        |        |        |
|----------------------|----------------------|----------------------|----------------------|-----------------------------|--------|--------|--------|--------|
|                      |                      |                      |                      | 1.23 V                      | 1.33 V | 1.43 V | 1.53 V | 1.63 V |
| 1.75                 | 1.18                 | 1.16                 | 0.83                 | 0.52                        | 0.42   | 0.32   | 0.22   | 0.12   |

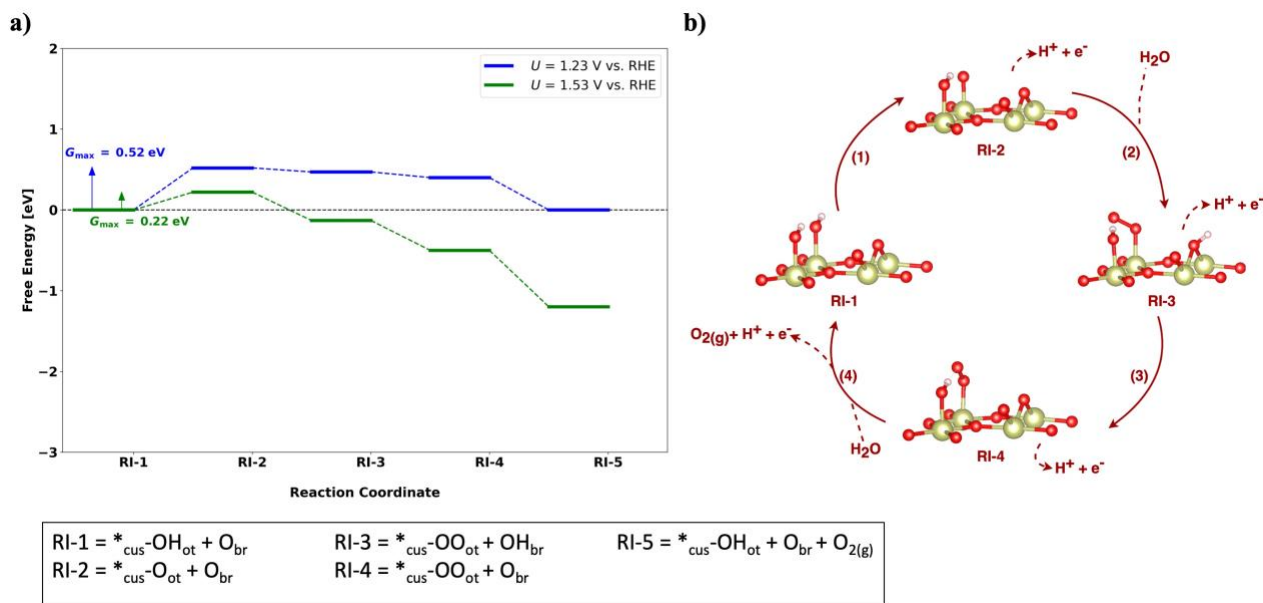

**Figure S25. a)** Free-energy diagram for the bifunctional-Walden mechanism on the partly hydroxylated  $\text{IrO}_2(110)$  surface at 1.23 V and 1.53 V vs. RHE. The reaction intermediates of the mechanistic cycle are labeled on the x-axis. Blue and green solid lines indicate intermediates' free energies at 1.23 V and 1.53 V, respectively. Colored arrows indicate the free-energy span governing  $G_{\text{max}}(U)$ , with the respective value displayed.

**b)** Schematic illustration of the bifunctional-Walden mechanism, as described in Section 8.2, on the partly hydroxylated  $\text{IrO}_2(110)$  surface. Numbers next to the arrows indicate the step sequence, and each structure represents the corresponding reaction intermediate.

## 11 Walden pathways over the fully oxygen-covered $\text{IrO}_2(110)$ surface

### 11.1 Mononuclear-Walden mechanism

**Table S29** compiles the free-energy changes for each elementary step at  $U = 0$  V vs. RHE and the activity descriptor  $G_{\text{max}}(U)$  at different applied electrode potentials under OER conditions. The corresponding free-energy diagram is depicted in **Figure S26a**, with a visual representation of the elementary steps in **Figure S26b**. The activity descriptor  $G_{\text{max}}(U)$  is governed by the span  $^*_{\text{cus}}\text{-OH}_{\text{ot}} \rightarrow ^*_{\text{cus}}\text{-O}_{\text{ot}} \rightarrow ^*_{\text{cus}}\text{-OOH}_{\text{ot}}$  for  $U = 1.23$  V vs. RHE, and for larger overpotentials the limiting span switches to  $^*_{\text{cus}}\text{-OH}_{\text{ot}} \rightarrow ^*_{\text{cus}}\text{-O}_{\text{ot}}$ .

**Table S29.** Energetic evaluation of the mononuclear-Walden mechanism on the fully oxygen-covered  $\text{IrO}_2(110)$  surface (cf. **Figure 1d** in the main text) by the framework of the descriptor  $G_{\text{max}}(U)$ . The table indicates the free-energy changes of each step at  $U = 0$  V vs. RHE and  $G_{\text{max}}(U)$  values at different applied electrode potentials ( $U$ ).

| $\Delta G_1$<br>[eV] | $\Delta G_2$<br>[eV] | $\Delta G_3$<br>[eV] | $\Delta G_4$<br>[eV] | $G_{\text{max}}(U)$<br>[eV] |        |        |        |        |
|----------------------|----------------------|----------------------|----------------------|-----------------------------|--------|--------|--------|--------|
|                      |                      |                      |                      | 1.23 V                      | 1.33 V | 1.43 V | 1.53 V | 1.63 V |
| 1.66                 | 1.33                 | 1.12                 | 0.80                 | 0.53                        | 0.33   | 0.23   | 0.13   | 0.03   |

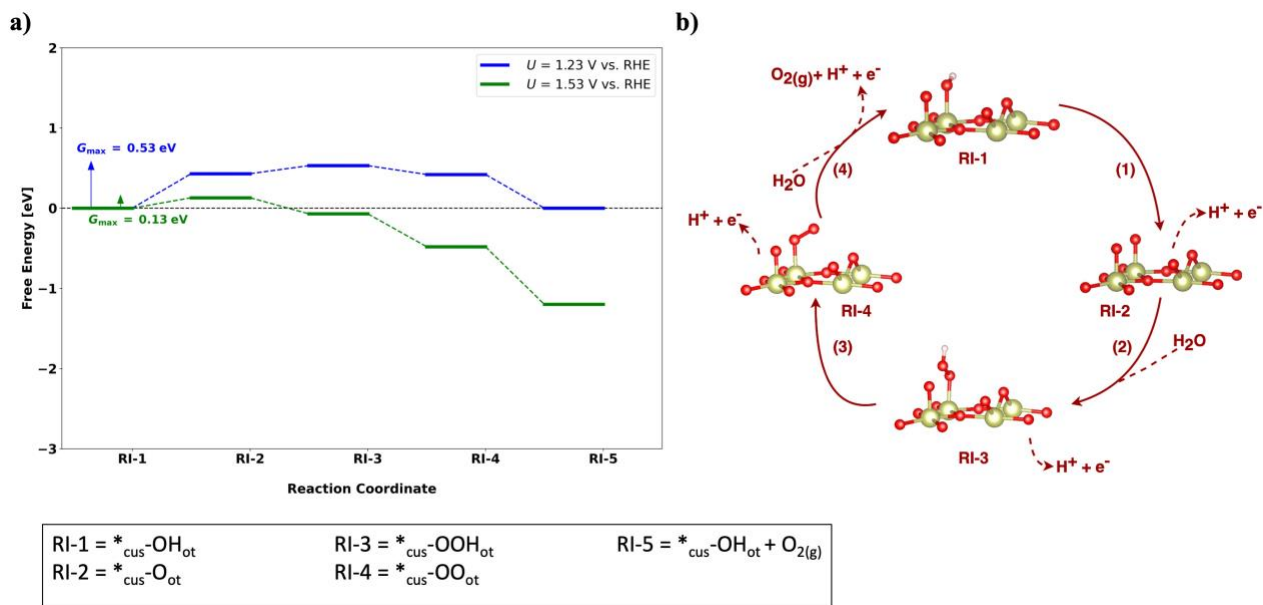

**Figure S26. a)** Free-energy diagram for the mononuclear-Walden mechanism on the fully oxygen-covered  $\text{IrO}_2(110)$  surface at 1.23 V and 1.53 V vs. RHE. The reaction intermediates of the mechanistic cycle are labeled on the x-axis. Blue and green solid lines indicate intermediates' free energies at 1.23 V and 1.53 V, respectively. Colored arrows indicate the free-energy span governing  $G_{\text{max}}(U)$ , with the respective value displayed.

**b)** Schematic illustration of the mononuclear-Walden mechanism, as described in Section 8.1, on the fully oxygen-covered  $\text{IrO}_2(110)$  surface. Numbers next to the arrows indicate the step sequence, and each structure represents the corresponding reaction intermediate.

## 11.2 Bifunctional-Walden mechanism

**Table S30** compiles the free-energy changes for each elementary step at  $U = 0$  V vs. RHE and the activity descriptor  $G_{\text{max}}(U)$  at different applied electrode potentials under OER conditions. The corresponding free-energy diagram is depicted in **Figure S27a**, with a visual representation of the elementary steps in **Figure S27b**. The activity descriptor  $G_{\text{max}}(U)$  is governed by the span  $^*_{\text{cus}}\text{-OH}_{\text{ot}} + \text{O}_{\text{br}} \rightarrow ^*_{\text{cus}}\text{-O}_{\text{ot}} + \text{O}_{\text{br}} \rightarrow ^*_{\text{cus}}\text{-OO}_{\text{ot}} + \text{OH}_{\text{br}}$  for  $U = 1.23$  V vs. RHE, and for larger overpotentials the limiting span switches to  $^*_{\text{cus}}\text{-OH}_{\text{ot}} + \text{O}_{\text{br}} \rightarrow ^*_{\text{cus}}\text{-O}_{\text{ot}} + \text{O}_{\text{br}}$ .

**Table S30.** Energetic evaluation of the bifunctional-Walden mechanism on the fully oxygen-covered  $\text{IrO}_2(110)$  surface (cf. **Figure 1d** in the main text) by the framework of the descriptor  $G_{\text{max}}(U)$ . The table indicates the free-energy changes of each step at  $U = 0$  V vs. RHE and  $G_{\text{max}}(U)$  values at different applied electrode potentials ( $U$ ).

| $\Delta G_1$<br>[eV] | $\Delta G_2$<br>[eV] | $\Delta G_3$<br>[eV] | $\Delta G_4$<br>[eV] | $G_{\text{max}}(U)$<br>[eV] |        |        |        |        |
|----------------------|----------------------|----------------------|----------------------|-----------------------------|--------|--------|--------|--------|
|                      |                      |                      |                      | 1.23 V                      | 1.33 V | 1.43 V | 1.53 V | 1.63 V |
| 1.66                 | 1.32                 | 1.13                 | 0.80                 | 0.52                        | 0.33   | 0.23   | 0.13   | 0.03   |

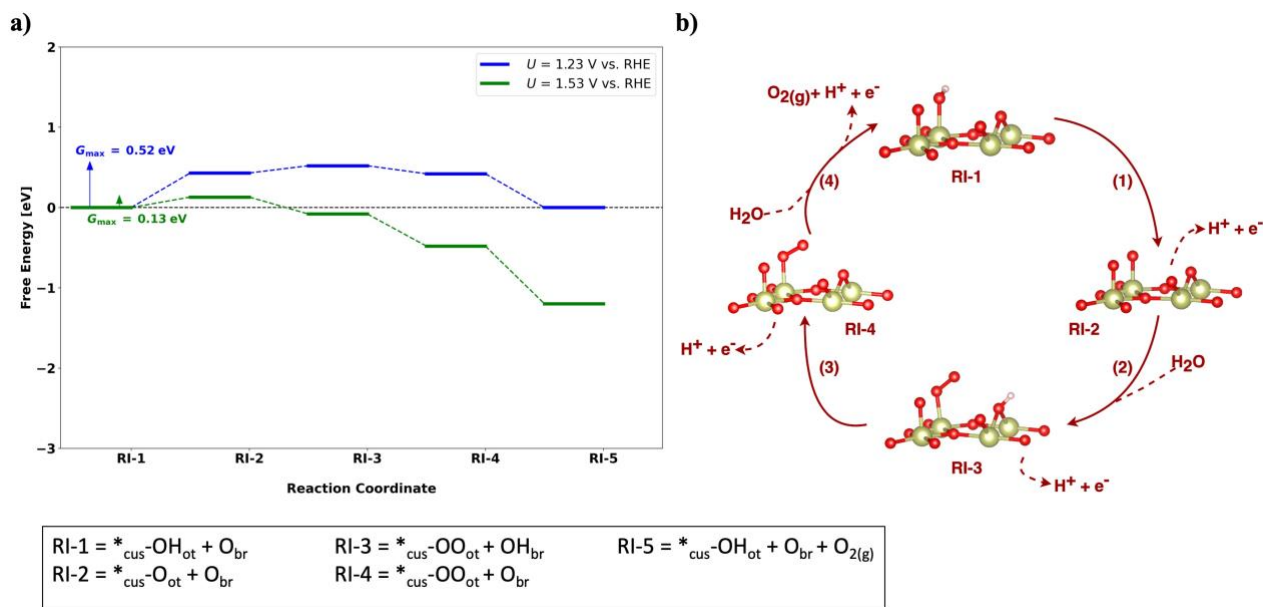

**Figure S27. a)** Free-energy diagram for the bifunctional-Walden mechanism on the fully oxygen-covered  $\text{IrO}_2(110)$  surface at 1.23 V and 1.53 V vs. RHE. The reaction intermediates of the mechanistic cycle are labeled on the x-axis. Blue and green solid lines indicate intermediates' free energies at 1.23 V and 1.53 V, respectively. Colored arrows indicate the free-energy span governing  $G_{\text{max}}(U)$ , with the respective value displayed.

**b)** Schematic illustration of the bifunctional-Walden mechanism, as described in Section 8.2, on the fully oxygen-covered  $\text{IrO}_2(110)$  surface. Numbers next to the arrows indicate the step sequence, and each structure represents the corresponding reaction intermediate.

## 12 Walden pathways over the partly OOH-covered $\text{IrO}_2(110)$ surface

### 12.1 Mononuclear-Walden mechanism

**Table S31** compiles the free-energy changes for each elementary step at  $U = 0$  V vs. RHE and the activity descriptor  $G_{\text{max}}(U)$  at different applied electrode potentials under OER conditions. The corresponding free-energy diagram is depicted in **Figure S28a**, with a visual representation of the elementary steps in **Figure S28b**. The activity descriptor  $G_{\text{max}}(U)$  is governed by the span  $^{*}_{\text{cus}}\text{-OH}_{\text{ot}} \rightarrow ^{*}_{\text{cus}}\text{-O}_{\text{ot}} \rightarrow ^{*}_{\text{cus}}\text{-OOH}_{\text{ot}}$  in the potential range of  $U = 1.23$  V to 1.53 V vs. RHE.

**Table S31.** Energetic evaluation of the mononuclear-Walden mechanism on the partly OOH-covered  $\text{IrO}_2(110)$  surface (cf. **Figure 1e** in the main text) by the framework of the descriptor  $G_{\text{max}}(U)$ . The table indicates the free-energy changes of each step at  $U = 0$  V vs. RHE and  $G_{\text{max}}(U)$  values at different applied electrode potentials ( $U$ ).

| $\Delta G_1$<br>[eV] | $\Delta G_2$<br>[eV] | $\Delta G_3$<br>[eV] | $\Delta G_4$<br>[eV] | $G_{\text{max}}(U)$<br>[eV] |        |        |        |        |
|----------------------|----------------------|----------------------|----------------------|-----------------------------|--------|--------|--------|--------|
|                      |                      |                      |                      | 1.23 V                      | 1.33 V | 1.43 V | 1.53 V | 1.63 V |
| 1.88                 | 2.19                 | 0.71                 | 0.13                 | 1.61                        | 1.41   | 1.21   | 1.01   | 0.81   |



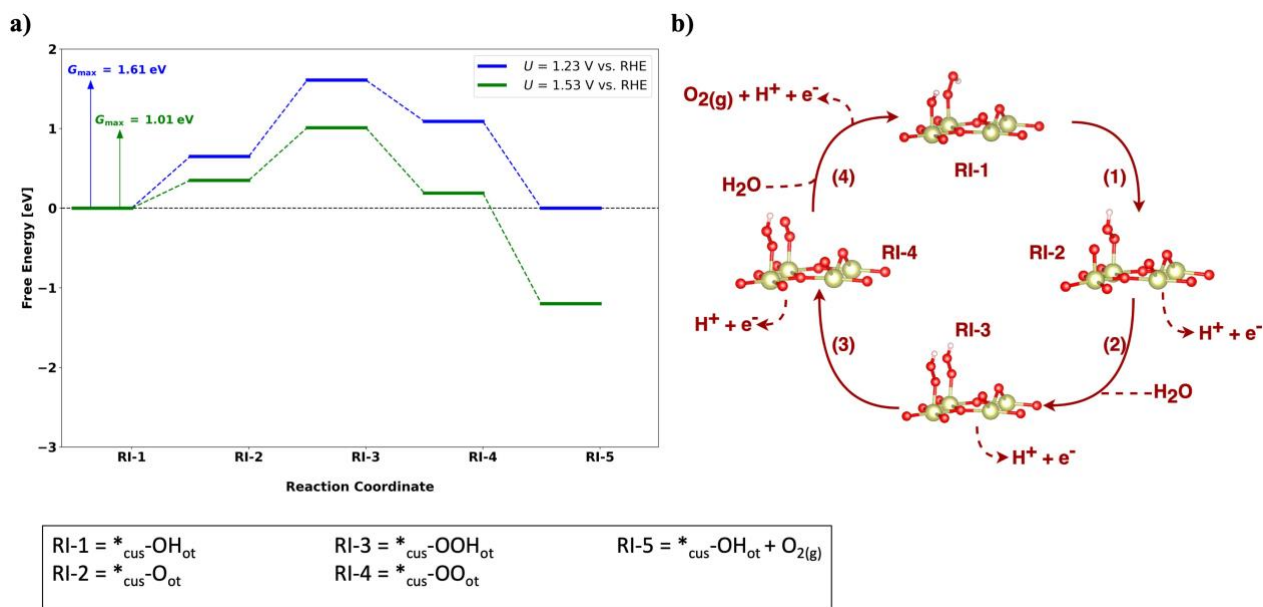

**Figure S28. a)** Free-energy diagram for the mononuclear-Walden mechanism on the partly OOH-covered  $\text{IrO}_2(110)$  surface at 1.23 V and 1.53 V vs. RHE. The reaction intermediates of the mechanistic cycle are labeled on the x-axis. Blue and green solid lines indicate intermediates' free energies at 1.23 V and 1.53 V, respectively. Colored arrows indicate the free-energy span governing  $G_{\text{max}}(U)$ , with the respective value displayed.

**b)** Schematic illustration of the mononuclear-Walden mechanism, as described in Section 8.1, on the partly OOH-covered  $\text{IrO}_2(110)$  surface. Numbers next to the arrows indicate the step sequence, and each structure represents the corresponding reaction intermediate.

## 12.2 Bifunctional-Walden mechanism

**Table S32** compiles the free-energy changes for each elementary step at  $U = 0$  V vs. RHE and the activity descriptor  $G_{\text{max}}(U)$  at different applied electrode potentials under OER conditions. The corresponding free-energy diagram is depicted in **Figure S29a**, with a visual representation of the elementary steps in **Figure S29b**. The activity descriptor  $G_{\text{max}}(U)$  is governed by the span  $^*_{\text{cus}}\text{-OH}_{\text{ot}} + \text{O}_{\text{br}} \rightarrow ^*_{\text{cus}}\text{-O}_{\text{ot}} + \text{O}_{\text{br}} \rightarrow ^*_{\text{cus}}\text{-OO}_{\text{ot}} + \text{OH}_{\text{br}} \rightarrow ^*_{\text{cus}}\text{-OO}_{\text{ot}} + \text{O}_{\text{br}}$  for  $U = 1.23$  V vs. RHE, and for larger overpotentials the limiting span switches to  $^*_{\text{cus}}\text{-OH}_{\text{ot}} + \text{O}_{\text{br}} \rightarrow ^*_{\text{cus}}\text{-O}_{\text{ot}} + \text{O}_{\text{br}}$ .

**Table S32.** Energetic evaluation of the bifunctional-Walden mechanism on the partly OOH-covered  $\text{IrO}_2(110)$  surface (cf. **Figure 1e** in the main text) by the framework of the descriptor  $G_{\text{max}}(U)$ . The table indicates the free-energy changes of each step at  $U = 0$  V vs. RHE and  $G_{\text{max}}(U)$  values at different applied electrode potentials ( $U$ ).

| $\Delta G_1$<br>[eV] | $\Delta G_2$<br>[eV] | $\Delta G_3$<br>[eV] | $\Delta G_4$<br>[eV] | $G_{\text{max}}(U)$<br>[eV] |        |        |        |        |
|----------------------|----------------------|----------------------|----------------------|-----------------------------|--------|--------|--------|--------|
|                      |                      |                      |                      | 1.23 V                      | 1.33 V | 1.43 V | 1.53 V | 1.63 V |
| 1.88                 | 1.35                 | 1.55                 | 0.13                 | 1.09                        | 0.79   | 0.49   | 0.35   | 0.25   |



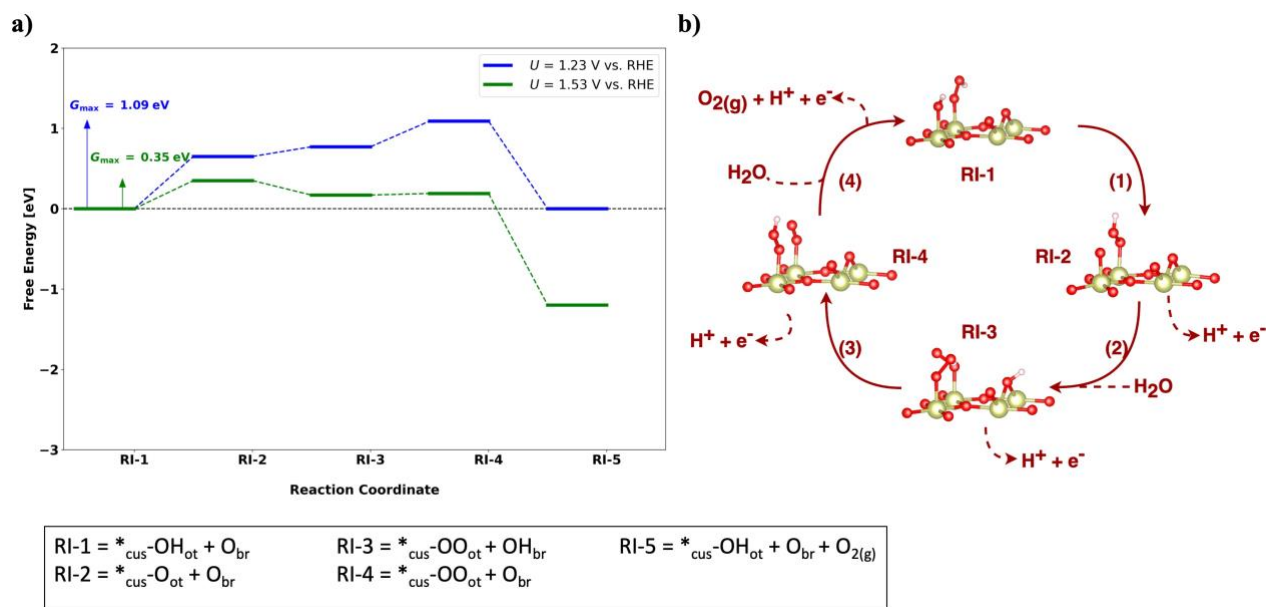

**Figure S29. a)** Free-energy diagram for the bifunctional-Walden mechanism on the partly OOH-covered  $\text{IrO}_2(110)$  surface at 1.23 V and 1.53 V vs. RHE. The reaction intermediates of the mechanistic cycle are labeled on the x-axis. Blue and green solid lines indicate intermediates' free energies at 1.23 V and 1.53 V, respectively. Colored arrows indicate the free-energy span governing  $G_{\max}(U)$ , with the respective value displayed.

**b)** Schematic illustration of the bifunctional-Walden mechanism, as described in Section 8.2, on the partly OOH-covered  $\text{IrO}_2(110)$  surface. Numbers next to the arrows indicate the step sequence, and each structure represents the corresponding reaction intermediate.

## Reference:

1. Kresse, G. & Hafner, J. Ab initio molecular dynamics for liquid metals. *Phys. Rev. B* **47**, 558–561 (1993).
2. Kresse, G. & Furthmüller, J. Efficiency of ab-initio total energy calculations for metals and semiconductors using a plane-wave basis set. *Comp. Mater. Sci.* **6**, 15–50 (1996).
3. Kresse, G. & Furthmüller, J. Efficient iterative schemes for ab initio total-energy calculations using a plane-wave basis set. *Phys. Rev. B* **54**, 11169–11186 (1996).
4. Momma, K. & Izumi, F. VESTA : a three-dimensional visualization system for electronic and structural analysis. *J. Appl. Crystallogr.* **41**, 653–658 (2008).
5. Korotcov, A. et al. Well-aligned IrO<sub>2</sub> nanocrystals. *J. Nanomater.* **2007**, 1–17 (2007).
6. Perdew, J. P., Burke, K. & Ernzerhof, M. Generalized gradient approximation made simple. *Phys. Rev. Lett.* **77**, 3865–3868 (1996).
7. Hammer, B., Hansen, L. B. & Nørskov, J. K. Improved adsorption energetics within density-functional theory using revised Perdew-Burke-Ernzerhof functionals. *Phys. Rev. B* **59**, 7413–7421 (1999).
8. Grimme, S., Antony, J., Ehrlich, S. & Krieg, H. A consistent and accurate ab initio parametrization of density functional dispersion correction (DFT-D) for the 94 elements H–Pu. *J. Chem. Phys.* **132**, 154104 (2010).
9. Kresse, G. & Joubert, D. From ultrasoft pseudopotentials to the projector augmented-wave method. *Phys. Rev. B* **59**, 1758–1775 (1999).
10. Mathew, K., Sundararaman, R., Letchworth-Weaver, K., Arias, T. A. & Hennig, R. G. Implicit solvation model for density-functional study of nanocrystal surfaces and reaction pathways. *J. Chem. Phys.* **140**, 084106 (2014).
11. Mathew, K., Kolluru, V. S. C., Mula, S., Steinmann, S. N. & Hennig, R. G. Implicit self-consistent electrolyte model in plane-wave density-functional theory. *J. Chem. Phys.* **151**, 234101 (2019).
12. Hossain, M. D., Huang, Y., Yu, T. H., Goddard III, W. A. & Luo, Z. Reaction mechanism and kinetics for CO<sub>2</sub> reduction on nickel single atom catalysts from quantum mechanics. *Nat. Commun.* **11**, 2256 (2020).
13. Henkelman, G., Arnaldsson, A. & Jónsson, H. A fast and robust algorithm for Bader decomposition of charge density. *Comp. Mater. Sci.* **36**, 354–360 (2006).
14. Nørskov, J. K. et al. Origin of the overpotential for oxygen reduction at a fuel-cell cathode. *J. Phys. Chem. B* **108**, 17886–17892 (2004).
15. Hansen, H. A., Rossmeisl, J. & Nørskov, J. K. Surface pourbaix diagrams and oxygen reduction activity of Pt, Ag and Ni(111) surfaces studied by DFT. *Phys. Chem. Chem. Phys.* **10**, 3722 (2008).
16. Eslamibidgoli, M. J., Huang, J., Kowalski, P. M., Eikerling, M. H. & Groß, A. Deprotonation and cation adsorption on the NiOOH/water interface: a grand-canonical first-principles investigation. *Electrochim. Acta* **398**, 139253 (2021).

17. Exner, K. S., Anton, J., Jacob, T. & Over, H. Chlorine evolution reaction on RuO<sub>2</sub>(110): ab initio atomistic thermodynamics study - pourbaix diagrams. *Electrochim. Acta* **120**, 460–466 (2014).
18. Rossmeisl, J., Logadottir, A. & Nørskov, J. K. Electrolysis of water on (oxidized) metal surfaces. *Chem. Phys.* **319**, 178–184 (2005).
19. Rossmeisl, J., Qu, Z.-W., Zhu, H., Kroes, G.-J. & Nørskov, J. K. Electrolysis of water on oxide surfaces. *J. Electroanal. Chem.* **607**, 83–89 (2007).
20. Nong, H. N. et al. Key role of chemistry versus bias in electrocatalytic oxygen evolution. *Nature* **587**, 408–413 (2020).
21. Halck, N. B., Petrykin, V., Krtíl, P. & Rossmeisl, J. Beyond the volcano limitations in electrocatalysis – oxygen evolution reaction. *Phys. Chem. Chem. Phys.* **16**, 13682–13688 (2014).
22. Fang, Y.-H. & Liu, Z.-P. Mechanism and Tafel Lines of electro-oxidation of water to oxygen on RuO<sub>2</sub> (110). *J. Am. Chem. Soc.* **132**, 18214–18222 (2010).
23. Ping, Y., Nielsen, R. J. & Goddard, W. A. The reaction mechanism with free energy barriers at constant potentials for the oxygen evolution reaction at the IrO<sub>2</sub> (110) Surface. *J. Am. Chem. Soc.* **139**, 149–155 (2017).
24. Busch, M., Ahlberg, E. & Panas, I. Electrocatalytic oxygen evolution from water on a Mn(III–V) dimer model catalyst—A DFT perspective. *Phys. Chem. Chem. Phys.* **13**, 15069 (2011).
25. Busch, M. Water oxidation: From mechanisms to limitations. *Curr. Opin. Electrochem.* **9**, 278–284 (2018).
26. Binninger, T. & Doublet, M.-L. The Ir–OOOO–Ir transition state and the mechanism of the oxygen evolution reaction on IrO<sub>2</sub> (110). *Energy Environ. Sci.* **15**, 2519–2528 (2022).
27. López, M., Exner, K. S., Viñes, F. & Illas, F. Computational pourbaix diagrams for MXenes: a key ingredient toward proper theoretical electrocatalytic studies. *Adv. Theory Simul.* **6**, 2200217 (2023).
28. Exner, K. S. On the mechanistic complexity of oxygen evolution: potential-dependent switching of the mechanism at the volcano apex. *Mater. Horiz.* **10**, 2086–2095 (2023).
29. Exner, K. S. A universal descriptor for the screening of electrode materials for multiple-electron processes: beyond the thermodynamic overpotential. *ACS Catal.* **10**, 12607–12617 (2020).
30. Razzaq, S. & Exner, K. S. Materials screening by the descriptor  $G_{\max}(\eta)$ : the free-energy span model in electrocatalysis. *ACS Catal.* **13**, 1740–1758 (2023).
31. Nørskov, J. K. et al. Trends in the exchange current for hydrogen evolution. *J. Electrochem. Soc.* **152**, J23 (2005).
32. Kozuch, S. & Shaik, S. How to conceptualize catalytic cycles? the energetic span model. *Acc. Chem. Res.* **44**, 101–110 (2011).
33. Heenen, H. H., Gauthier, J. A., Kristoffersen, H. H., Ludwig, T. & Chan, K. Solvation at metal/water interfaces: An ab initio molecular dynamics benchmark of common computational approaches. *J. Chem. Phys.* **152**, 144703 (2020).

34. Exner, K. S. Importance of the walden inversion for the activity volcano plot of oxygen evolution. *Adv. Sci.* **10**, 2305505 (2023).
35. Lewis, D. E. *Addition, Elimination and Substitution: Markovnikov, Hofmann, Zaitsev and Walden: Discovery and Development*. (Elsevier, Amsterdam, Netherlands, 2022).
36. Yu, S., Levell, Z., Jiang, Z., Zhao, X. & Liu, Y. What Is the rate-limiting step of oxygen reduction reaction on Fe–N–C catalysts? *J. Am. Chem. Soc.* **145**, 25352–25356 (2023).
